# Supplementary material
Source: publisher figshare collection journal article supplement (https://gsajournals.figshare.com/ndownloader/files/14414963)
Supplement: Supplementary file 1 [file 14414963]

## Sheet: WS1 - Eigenvectors
WS1. Eigenvectors from eigenanalysis of the pooled Procrustes-aligned phenotypic data from all three data sets included in this study.
The data sets are the DGRP, knockdown and MENC data. These eigenvectors were used to score the data for all subsequent analyses.
The 97 variables are centroid size, plus the Procrustes-aligned x and y coordinates of the 48 landmarks and semi-landmarks shown in Fig 1.
_NAME_	X1	X2	X3	X4	X5	X6	X7	X8	X9	X10	X11	X12	X13	X14	X15	X16	X17	X18	X19	X20	X21	X22	X23	X24	X25	X26	X27	X28	X29	X30	X31	X32	X33	X34	X35	X36	X37	X38	X39	X40	X41	X42	X43	X44	X45	X46	X47	X48	Y1
Prin1	0.0358458	0.159571	0.141863	0.269284	-0.0822039	-0.106382	0.055359	-0.00335867	-0.0854807	-0.097322	-0.242003	-0.0937929	-0.0399968	0.0113869	0.0754329	0.0652487	0.0173419	-0.0190532	-0.0649605	-0.083188	-0.0608366	0.107701	0.0352618	-0.0211632	-0.015468	0.0193767	0.0497062	0.0802208	0.0765061	-0.082467	0.0137476	-0.0469268	-0.0695085	0.111008	0.071867	0.00807278	-0.0455826	0.0931992	0.0369113	-0.0266055	-0.0987052	-0.191989	0.161651	0.0759925	-0.0170899	-0.114736	-0.0746373	0.0109018	-0.210696
Prin2	0.211942	-0.0948061	-0.144421	0.389439	-0.0203208	-0.0246032	0.221476	0.138265	-0.0962478	-0.093994	0.13107	-0.03884	-0.1246	-0.0963822	-0.091126	-0.082206	-0.0559615	-0.0486987	-0.0677417	-0.0779201	-0.100179	-0.145247	-0.105544	-0.094843	-0.0768825	-0.0752186	-0.0770166	-0.0874703	-0.0856005	-0.0713756	0.178947	0.0655753	0.0136567	-0.0661289	-0.0666405	-0.0668811	-0.0700902	-0.122412	-0.0821876	-0.0369558	0.0120988	0.0825912	0.322617	0.274778	0.217302	0.172106	-0.0287831	0.185462	-0.0226717
Prin3	0.137443	0.0340531	-0.0462584	-0.192281	-0.00310513	-0.0958061	0.366553	0.37532	0.286649	0.296735	-0.172897	0.00628467	-0.033459	-0.0598068	-0.0678496	-0.0635939	-0.0662198	-0.0594794	-0.0550721	-0.057865	-0.0545103	-0.0454516	-0.0273583	-0.032803	-0.0321264	-0.0307444	-0.0333777	-0.0360517	-0.0592121	-0.0710353	0.145384	0.0917297	0.0639072	0.0927804	0.0775623	0.0595084	0.0321049	-0.0215082	-0.0377317	-0.0556112	-0.0721287	-0.106308	-0.18478	-0.175347	-0.16287	-0.15899	-0.0380024	0.343624	-0.0155589
Prin4	0.185258	0.0524109	0.097099	-0.393269	-0.0608143	0.0185082	0.184085	0.101919	-0.390614	-0.411304	0.265511	-0.123336	-0.128469	0.0135883	0.0314699	0.003906	-0.00787214	-0.015631	-0.0184553	-0.00901325	0.00507804	0.0577794	0.0364808	-0.0014922	0.0129763	0.0225554	0.032202	0.0377172	0.0235363	-0.0486107	0.172961	0.0242633	-0.0520816	0.0252648	-0.00378268	-0.057313	-0.0869082	0.0449399	0.0692773	0.0967628	0.124309	0.167432	-0.231342	-0.119182	-0.00126153	0.119991	-0.0273757	0.160846	-0.0432292
Prin5	-0.2041	0.138266	0.112424	-0.114572	-0.0133141	0.00257837	-0.119683	-0.0218294	0.285284	0.310012	0.24952	-0.0618677	-0.195389	-0.122164	-0.108405	-0.0950831	-0.0778323	-0.0846225	-0.100259	-0.105069	-0.0982073	0.0360407	0.0152744	-0.058441	-0.0720688	-0.0637441	-0.0585832	-0.058607	-0.0669542	-0.0758602	-0.17785	-0.134978	-0.10144	0.102536	0.0600691	-0.00781167	-0.0649599	0.133936	0.15509	0.180674	0.212913	0.248458	-0.0281748	0.0378605	0.106055	0.17467	-0.00130899	-0.0684825	-0.0534279
Prin6	0.301404	0.180251	-0.0656248	-0.0653223	0.0822218	0.0964518	-0.168118	-0.293556	-0.0812515	-0.0647531	-0.0397734	0.0593567	0.021076	-0.0326243	-0.0450085	-0.0299241	-0.00876086	0.0127013	0.00250912	-0.0139636	-0.0359443	-0.0837288	0.0596576	0.0467275	0.0285259	0.0351808	0.0366387	0.0324602	-0.0183682	0.0809661	0.169785	0.118227	0.0744172	0.0815447	0.0612034	0.00454868	0.00608723	-0.0692055	-0.0647815	-0.0553715	-0.0439599	-0.0326613	-0.0587408	-0.0476741	-0.035478	-0.0337711	0.107702	-0.211279	0.0650149
Prin7	-0.447178	0.0608148	0.0241489	0.0529243	0.122628	0.164188	0.14143	0.198146	-0.260015	-0.252848	-0.0613613	0.00110058	0.108768	-0.0323507	-0.0206788	0.00053273	0.0133075	0.0136472	-0.003427	-0.0261586	-0.0602198	-0.00673578	0.0634317	0.030884	-0.00234771	0.00728791	0.0127653	0.0119723	-0.00285088	0.162293	-0.283072	-0.153045	-0.0548657	0.0655954	0.0749169	0.0701768	0.109453	-0.00886278	-0.0223777	-0.0336795	-0.0462296	-0.0631382	0.0320273	0.0129801	-0.00591024	-0.0294101	0.151204	0.170138	0.0759437
Prin8	0.0644908	0.0940383	0.117082	-0.094151	0.00760647	0.0160423	-0.0695219	0.00668635	-0.0576642	-0.064553	0.0331809	0.0582425	0.142914	-0.0567858	-0.0285901	0.0148013	0.0292571	0.015301	-0.030987	-0.0556119	-0.0354669	0.0768211	-0.133421	-0.158691	-0.0915439	-0.0810501	-0.0902777	-0.111709	-0.0975224	0.068264	0.0153361	0.027482	0.041654	0.0752014	0.0771213	0.0840702	0.0768548	0.10467	0.0930614	0.0747278	0.0475857	0.0216233	-0.0711535	-0.0586465	-0.0397244	-0.0129197	-0.00844008	-0.0356845	-0.128737
Prin9	0.0825189	-0.0622889	0.13416	0.00475477	0.565597	0.0121296	-0.016218	-0.0256437	-0.00615908	0.0065409	-0.179156	0.0482009	-0.131535	-0.0391551	-0.0391264	-0.025149	-0.00275599	-0.0011179	-0.0187843	-0.0324101	-0.0417298	0.070965	0.0289594	0.00305381	-0.00754003	-0.00848443	-0.0096134	-0.00975722	0.0243631	-0.0602906	0.0361381	0.0139976	0.0208452	-0.059779	-0.0651552	-0.0721948	-0.0824174	0.104193	0.0566946	0.00195156	-0.0574133	-0.139057	-0.0303485	-0.0627923	-0.0982637	-0.129158	0.321861	-0.0234293	-0.0880383
Prin10	-0.164384	0.32246	-0.0645591	0.00132274	-0.025407	-0.00593504	-0.0475724	0.0850159	-0.0778447	-0.094255	0.0033147	0.256973	0.0193098	0.0108977	-0.0522426	-0.053817	-0.0495696	-0.058574	-0.0518702	-0.0381764	0.03584	0.000862662	-0.103103	-0.0668242	0.00397585	-0.00434115	-0.0184092	-0.0295585	0.063259	-0.0120784	-0.087191	0.0657476	0.159486	0.242513	0.187685	0.100455	0.0192483	-0.0748281	-0.0634606	-0.0547413	-0.0503057	-0.029468	-0.0332425	-0.0464683	-0.0540972	-0.0389823	-0.0245817	-0.00247835	0.00298623
Prin11	0.0373857	0.0449831	0.0427663	-0.00459046	-0.110188	-0.232444	-0.0339969	-0.110625	0.0154066	0.0436222	-0.027821	0.20781	0.0274693	0.242383	0.180025	0.0766302	0.0502977	0.0456537	0.0228439	0.000551325	-0.0683577	-0.0249518	-0.0295724	-0.0505177	-0.00333328	0.0220606	0.0328554	0.0302113	0.0287787	-0.177042	-0.0245461	0.0573897	0.131165	-0.00140198	-0.0301528	-0.0888776	-0.107891	0.0329949	0.0252706	0.0184607	0.0127341	-0.00543205	0.000998927	-0.00295624	-0.012583	-0.0211742	-0.18289	-0.0794042	0.0314789
Prin12	-0.0474932	-0.199354	0.213424	0.0120718	-0.324075	0.0673996	0.0568917	-0.0386127	-0.0519838	-0.0472007	-0.0685194	0.303029	0.131852	-0.0192222	-0.0746424	-0.0610637	-0.0238397	-0.0042408	-0.0541774	-0.0948047	-0.1307	0.0418284	0.0534908	0.016904	-0.0199049	-0.014579	-0.00968781	-0.00270813	-0.00631753	0.102267	-0.00600395	0.129408	0.212475	-0.143491	-0.0903918	0.00105231	0.0689945	0.190146	0.146264	0.0942768	0.0335677	-0.0384754	-0.0220803	-0.0360593	-0.0504247	-0.0664517	-0.141521	0.0126837	0.0104263
Prin13	-0.226845	-0.0517808	0.0080205	-0.0359223	0.252091	-0.307455	0.0247083	0.0743914	-0.0865719	-0.0986084	0.085055	0.380541	-0.0421193	0.0636008	-0.0147286	-0.0426182	-0.0392418	-0.0305524	-0.0013636	0.00751356	0.0323384	0.0286284	0.0752961	0.0307605	-0.0140457	-0.0232917	-0.0341337	-0.0453204	-0.0681594	-0.269103	-0.0863525	0.15334	0.271881	-0.0395962	-0.0697789	-0.106888	-0.159198	-0.0130778	0.000210243	0.0149905	0.0317762	0.0520806	0.0236773	0.0515017	0.0844287	0.110691	0.0189619	0.0302676	0.0103194
Prin14	-0.0371301	-0.0788461	0.0529863	-0.0162788	0.074495	-0.140516	-0.159792	0.260418	0.00375069	-0.0199078	0.0133257	-0.250806	0.052191	0.259467	0.158086	0.0575884	0.0535177	0.0793108	0.05334	6.46352e-05	-0.148348	-0.0753573	-0.0520309	-0.0388921	-0.00590865	0.00116605	0.00642442	0.0155876	0.0284806	-0.0808476	-0.0325273	-0.0731076	-0.163908	-0.0195492	-0.0141462	0.00338046	0.00175744	0.0714417	0.0619191	0.0504543	0.0379862	0.0191908	-0.0133011	-0.0068931	8.36164e-05	0.00921209	-0.0317961	0.0342642	0.277352
Prin15	-0.036928	0.0476911	0.0493589	-0.0102069	0.13997	0.00986225	0.467904	-0.520031	0.038284	0.0389364	0.0393776	-0.111941	-0.0299486	0.0263127	0.0469656	0.0235558	-0.0117271	-0.00780014	-0.0203187	-0.0437257	-0.0654182	0.0234242	-0.0502857	-0.0473581	-0.0222234	-0.0223683	-0.0186313	5.9624e-05	0.0225987	0.000258011	0.0120986	-0.0329096	-0.0368469	-0.0376455	-0.0436078	-0.0603255	-0.0669041	0.0604939	0.0579421	0.05168	0.0428402	0.0331831	-0.0369128	-0.0236748	-0.00203723	0.0227308	0.113425	-0.00917623	0.036559
Prin16	0.0466005	0.112758	-0.0814657	-0.0422232	-0.00182957	0.0664893	-0.0225755	0.00740359	-0.0167288	-0.0411086	0.017988	0.14058	-0.155328	-0.240547	-0.0553387	-0.0202674	-0.0586757	-0.0361563	0.0177675	0.0203628	-0.00862125	-0.0254032	0.0160659	0.0482534	-0.0224669	-0.041183	-0.0434302	-0.0361334	-0.0658835	-0.0001249	-0.00660443	0.0727448	0.10167	0.0725409	0.0463188	-0.0111033	-0.0324725	-0.0309283	-0.0218968	-0.00962457	0.00385033	0.0111335	0.0383978	0.0596616	0.0875356	0.0852651	0.0624436	-0.00770936	0.0311948
Prin17	0.277901	-0.0447138	0.081617	0.0261494	0.104798	0.0171901	-0.309273	0.298011	-0.0553362	-0.0330865	0.0118551	0.0165664	-0.0343651	-0.167675	-0.0206578	0.0256924	-0.0360629	-0.0275559	-0.0426195	-0.0889713	-0.115082	0.078261	-0.0170756	-0.0718987	-0.0555813	-0.0475352	-0.0445057	-0.0321303	-0.0035818	0.0270514	-0.035853	0.0183938	0.0108584	0.00584173	0.0143928	0.0298343	0.0483966	0.0512324	0.0434256	0.0336535	0.0192277	0.00426539	-0.00534221	-0.000192769	0.0137473	0.0213577	0.109801	-0.100425	-0.0147885
Prin18	-0.059683	-0.118699	0.099812	0.0457618	-0.0754151	0.365034	-0.0609796	0.104005	0.0292928	0.00461525	-0.0528488	0.0906807	-0.447541	0.0389394	0.0550272	-0.00573941	-0.035466	-0.0325006	-0.00257646	0.0129742	-0.0782549	-0.0459452	0.0220762	-0.000729495	0.0110451	0.010205	0.00851293	0.00594938	0.00146316	0.100547	0.0451337	0.0604366	0.0574799	-0.0675771	-0.0628506	-0.0357245	-0.0583913	0.077551	0.0518089	0.0210351	-0.0137809	-0.0434148	-0.004312	-0.0355206	-0.0655088	-0.0789822	0.106868	0.0561868	0.1608
Prin19	-0.000664557	-0.18102	0.0621856	0.0113197	0.0309379	-0.202499	-0.00652009	-0.018094	-0.00954648	-0.00818263	0.0238049	0.000303616	0.359919	-0.323521	-0.0922926	0.0489708	0.00766204	-0.0175684	0.0172442	0.0445688	-0.021507	-0.18876	0.0704048	0.0497563	0.0163054	0.0283964	0.0360268	0.039047	0.0178244	0.0387544	0.0319694	0.0197104	0.0107996	-0.11949	-0.0608219	0.0395095	0.111065	0.0814258	0.0716964	0.062316	0.0494294	0.0463356	-0.0196511	-0.021066	-0.0250573	-0.0284386	-0.110563	0.0275737	0.145949
Prin20	-0.0735486	-0.046525	0.144677	0.0200372	-0.0447691	0.171706	0.131904	-0.133855	0.00822547	-0.0151072	-0.046204	0.0085247	-0.0409533	-0.118442	-0.0346241	0.00150816	-0.0228713	-1.5439e-05	0.0190572	-0.00619892	-0.0771397	0.114449	-0.015123	-0.102151	-0.0372043	-0.0498567	-0.0813703	-0.11548	-0.0130311	0.0941012	0.0569212	0.0890757	0.0571629	-0.0554348	-0.0369058	-0.00937986	0.0311724	0.0825807	0.0631375	0.0452011	0.0218035	-0.0129511	0.0231706	0.00114508	-0.0217639	-0.0311978	0.0271578	0.0293848	0.190026
Prin21	-0.074385	-0.0219562	0.0471887	0.0619753	0.0220996	-0.016915	0.0254787	-0.00731838	0.00524689	0.00110398	-0.0306103	0.137939	-0.0516487	0.0291933	-0.0171829	0.00811986	0.0109995	-0.00921105	0.0158779	0.0171927	-0.0775551	-0.092168	0.0215075	0.0184446	-0.0146603	-0.00447699	0.0114655	0.0279715	0.0432796	-0.0709951	0.0622303	0.103518	0.114926	-0.0324042	-0.0438426	-0.0820446	-0.0710686	0.0428287	0.0313706	0.0242097	0.0208827	-0.00438594	-0.0352753	-0.045465	-0.0531153	-0.0562861	0.00505234	0.00286769	0.0446773
Prin22	-0.0617808	0.0482905	0.0294011	0.0180938	0.0556999	-0.115603	0.0477398	-0.0723553	-0.00622725	0.0119989	0.0154174	0.0377755	0.0804405	-0.0372976	-0.0250059	-0.0352411	-0.0493212	-0.0400228	-0.0456737	-0.0587892	-0.0824959	-0.0870166	-0.0920221	-0.0450303	-0.019308	-0.0236106	-0.0262516	-0.0100517	-0.00209163	-0.0137272	0.102239	0.06828	0.0468344	0.0293741	0.0273788	0.0136489	0.0295016	0.0886284	0.0715562	0.0531137	0.0330266	0.0270408	0.00645592	0.00260034	0.00349449	0.00668501	-0.0114022	0.0056102	0.078909
Prin23	0.132113	-0.0405009	0.0715868	0.0478912	0.0990793	-0.0776499	-0.053289	0.0515665	-0.042969	-0.0270743	0.00475737	0.00822246	0.138803	0.0560451	-0.0865649	-0.0745281	-0.048613	-0.0443857	-0.0617903	-0.0861706	-0.0743705	0.0440471	-0.177649	-0.0990597	0.0171841	-0.00530769	-0.011493	0.0162009	0.038777	-0.0196111	-0.0100178	0.00208256	0.00334522	0.00737704	0.00816028	0.000834439	0.0172548	0.0735318	0.0616995	0.0567452	0.0540975	0.0393576	-0.010503	-0.00566363	0.00464785	0.00962659	0.00811782	-0.0159412	-0.0693522
Prin24	-0.0736355	0.147962	-0.0817663	0.0366483	-0.00796528	-0.100789	0.0420623	-0.0862696	0.0243939	-0.0339515	0.0294056	0.00211115	0.0699855	-0.223176	0.079688	0.0508742	-0.00281406	0.0278063	-0.0566269	-0.118596	-0.0514158	0.241466	-0.0683433	-0.0362375	-0.0171797	-0.0104825	0.0120878	0.0304361	-0.0458089	-0.0172148	0.0512749	0.061734	0.0270993	0.107906	0.0977876	0.103457	0.0485532	-0.0953514	-0.0794225	-0.0603166	-0.0311802	-0.000564238	-0.00271351	0.015119	0.025295	0.0129644	-0.0495506	0.00525398	0.239981
Prin25	-0.0926268	-0.0313851	-0.00144773	-0.0475266	0.0304387	-0.103323	0.00207644	0.00633982	0.0794619	-0.00790264	0.0195474	-0.0633676	0.0989986	-0.210905	0.00827422	-0.0106502	-0.0345604	0.00617599	-0.00930148	-0.0232347	-0.00630975	0.154969	0.244406	0.1206	0.055672	0.0556787	0.0532386	0.0339395	0.0273226	-0.026896	0.0940406	-0.047389	-0.0654988	-0.0319542	-0.0288313	-0.0395689	-0.010936	-0.0624182	-0.0491756	-0.041934	-0.0418771	-0.0323157	0.0181096	0.00271968	0.00200079	0.0127601	-0.043251	0.0378172	-0.02496
Prin26	0.0321149	0.0461401	-0.15191	0.00511634	-0.0765995	0.0531004	-0.0656246	-0.0275418	0.00666322	0.0446793	0.0689166	0.0986126	-0.254185	-0.0783179	0.0185524	0.0215171	0.0334853	0.0388281	-0.0162914	-0.0166659	0.204351	0.0595398	0.0430083	0.0824396	0.0133873	0.0327502	0.0324323	-0.000178476	-0.0318122	0.0315643	-0.0414996	0.0513827	0.0802221	0.050099	0.0261315	-0.0213206	-0.0343945	-0.0995062	-0.0689486	-0.0367387	-0.00609685	0.0614947	-0.0218876	-0.0407266	-0.0604524	-0.0541374	-0.075982	0.0442889	0.0997906
Prin27	-0.0518075	-0.0725982	0.0347054	0.0440285	-0.0233068	0.0271137	-0.00683476	-0.0123089	-0.0505034	0.0170398	0.00601332	0.0582955	0.0235966	-0.128202	0.158514	0.00544859	-0.024225	-0.01369	-0.0494945	-0.014021	0.113338	-0.3808	-0.0275193	0.0192109	-0.00454127	-0.0155905	-0.0267117	-0.00262906	-0.0675696	0.0893892	0.0020372	-0.0325831	-0.00430761	-0.0503145	-0.0124444	0.0661865	0.097625	0.0701899	0.0653048	0.0647249	0.0606897	0.0659535	-0.0497977	-0.0410195	-0.0295264	-0.0295522	0.0922258	0.0402681	-0.165539
Prin28	-0.0261152	0.0496669	-0.0853513	-0.0194508	0.0382492	-0.0299873	0.0343063	-0.03086	0.0342993	-0.04158	0.062079	-0.0350409	0.0254879	0.0656628	-0.105035	-0.0411044	-0.0114043	-0.00307943	0.0395099	0.0340616	-0.10449	0.0550228	0.0626696	0.0474134	0.0180544	0.0244945	0.0157652	0.0028549	0.0559737	-0.0713282	0.0275908	-0.00713256	-0.0287797	0.0181982	0.0294484	0.0895156	0.00449104	-0.0747848	-0.0494687	-0.0265269	-0.00697083	0.0458569	-0.00880316	-0.0199129	-0.0301417	-0.0290208	0.000232228	0.00546423	0.0942593
Prin29	0.0539383	-0.00710817	0.0131552	0.0105758	0.149609	-0.0766817	0.0280621	0.0857644	0.0170778	-0.0277505	0.0452644	-0.00671728	0.0681162	-0.0948562	0.0751153	0.031506	0.00366819	0.0109266	-0.0140752	-0.0302762	0.11361	-0.138971	0.0515139	7.84319e-05	-0.0167801	-0.0225509	-0.0449636	-0.0501068	0.199838	-0.0685173	-0.0781943	-0.0396931	-0.0168377	-0.0112096	-0.0150767	-0.0204372	-0.0359648	0.0222707	0.0190253	0.0190485	0.0237257	0.0269671	-0.00781707	-0.0344555	-0.0395144	-0.0318078	-0.0221781	-0.116316	-0.140634
Prin30	0.151448	-0.0635155	0.044157	-0.0141332	-0.0972072	-0.0728135	-0.0570662	-0.0279247	0.0590291	-0.0193048	-0.0155407	-0.00183855	0.00597674	-0.1379	0.0151199	-0.0604635	-0.0310808	-0.034204	0.0530347	0.0890596	-0.0431092	0.331951	0.256787	0.067621	0.0701411	0.0632435	0.0443953	-0.0141579	-0.0947036	-0.0458637	-0.16353	-0.0278828	-0.0011666	-0.0917219	-0.0844209	-0.0791208	-0.0599935	0.00618797	-0.00232767	-0.0162721	-0.0405874	-0.0392577	0.0305584	0.0173941	0.00691867	-0.000251836	5.72991e-05	0.12428	-0.281079
Prin31	0.0204548	0.0598235	-0.0241102	0.00711865	-0.0328865	0.0329087	-0.198564	-0.143806	0.011607	0.0344606	0.0124877	-0.0401343	0.170132	-0.0030953	-0.0189227	0.0463637	0.0416827	0.0485967	0.00322542	-0.00197752	0.137795	0.0140583	-0.0125059	-0.0345995	0.000654527	0.00347706	0.00764487	0.0305188	0.0679882	-0.195798	-0.111764	0.0159498	-0.0305543	-0.0068479	-0.0576006	-0.145126	-0.195839	-0.0247656	-0.0167687	-0.011688	-0.0113109	0.00241591	-0.0552736	-0.036118	-0.0119387	0.0285402	0.142206	0.481886	0.14088
Prin32	-0.036331	-0.0358807	0.0110319	0.0452635	0.0740322	-0.0247649	-0.119916	-0.0810638	-0.170965	0.0992536	-0.0343472	0.0222792	-0.13486	-0.0811556	0.053998	0.0546389	0.0362606	0.0385874	0.023086	0.082404	0.0101855	0.1094	-0.0192097	-0.0198603	0.0307681	0.0246397	0.0267354	0.0348358	0.0607134	0.0267873	0.00737164	-0.043298	-0.0310443	-0.055604	-0.0558877	-0.049321	-0.0615171	0.0325525	0.0362728	0.0348539	0.0177109	0.0339635	-0.0127196	-0.0146555	-0.018275	-0.0136587	-0.158445	0.245154	-0.0123622
Prin33	0.154048	0.0267644	0.0381233	0.0444073	0.0286394	0.137483	-0.0601149	-0.132121	0.0887033	-0.074725	0.0160278	-0.0537742	-0.00828462	0.0692644	-0.0542709	-0.0426622	-0.0318127	-0.0266457	-0.0244999	-0.0724654	0.014753	-0.16149	0.0770902	0.0362693	-0.000947122	0.00152779	-0.0120771	-0.0273899	-0.0268672	0.0403171	-0.203749	0.0476023	0.055584	-0.0093753	0.011646	0.0424573	0.0555426	-0.000219148	-0.00562326	-0.0101377	-0.00535321	-0.0297631	-0.0546527	-0.0198165	0.031371	0.0477872	-0.102999	0.186429	-0.141981
Prin34	-0.0444801	0.0152923	0.0105893	0.0185981	-0.0652641	0.033167	-0.105964	-0.100469	-0.077032	0.0851342	-0.0792911	0.00995117	-0.0177218	-0.11235	0.0434347	0.0162245	0.0116682	0.00590473	-0.00801611	0.0203288	0.0736383	0.0941202	-0.0848046	-0.0162872	0.027003	0.016071	0.0356684	0.0551802	0.0186409	-0.0186969	0.0540439	-0.0272455	-0.0524154	-0.0396085	-0.0523204	-0.0703857	-0.0762448	0.0888288	0.0611663	0.0441188	0.0538791	0.000693371	0.054006	0.0215111	-0.04628	-0.104331	-0.0408011	0.271146	0.108653
Prin35	-0.06611	-0.0296693	-0.0265888	0.088416	-0.0596418	0.061123	0.206353	0.188555	-0.0907666	0.0937858	-0.00245835	-0.0760585	0.00840436	-0.0146562	-0.0868179	5.92519e-05	0.00982131	0.0212174	-0.00540329	-0.00542755	0.184452	0.186792	0.138127	0.038211	0.0356488	0.0404868	0.0331837	0.0155832	-0.0130334	-0.115216	0.115509	0.00961456	-0.0627639	-0.0274774	-0.0614673	-0.0944979	-0.126679	0.00333344	0.00407287	0.00745977	0.0215254	0.0223695	-0.0782518	-0.0520305	-0.0166246	0.00302822	-0.0127521	-0.41274	0.207352
Prin36	-0.0893171	-0.00616995	-0.079752	-0.0269784	-0.0128554	0.0239765	-0.0449098	0.00202469	0.0444316	-0.0419265	0.0240829	0.0677915	-0.00292874	-0.064883	0.022476	-0.0085534	0.0137919	0.0111415	0.0589521	0.0624679	-0.0561424	0.143887	0.0685156	0.00684745	0.0297339	0.0311153	0.00429251	-0.025401	-0.00822129	0.0797589	0.0508875	-0.0544753	-0.0246242	-0.0167781	-0.010417	-0.0184111	-0.0182492	-0.0785811	-0.0731625	-0.0558441	-0.00843693	-0.0229379	-0.0985439	-0.0294832	0.0485702	0.114495	-0.0419959	0.110739	-0.0438596
Prin37	0.0430554	-0.0187937	0.0138311	0.0280211	-0.0131018	0.0380367	-0.00561199	0.0341928	-0.0502854	-0.0171541	-0.060553	-0.0578889	0.0665831	0.194938	-0.160483	-0.0217385	-0.031228	-0.00280784	-0.0417636	-0.108749	0.149456	-0.0374864	0.125214	0.0423335	0.0025212	-0.000735543	-0.0204077	-0.0792691	-0.0551745	-0.0783638	0.0429532	0.000806482	-0.0317147	-0.0502252	-0.0458936	-0.0414899	-0.0781818	0.071006	0.0520553	0.0424082	0.0357322	0.00947294	0.047155	0.0214069	-0.000104908	-0.041084	0.0321189	0.0569925	0.0980648
Prin38	-0.0787715	0.0148081	0.110135	0.00278531	0.0586805	-0.0814802	-0.153103	-0.136696	0.29608	-0.24148	0.015078	0.011757	-0.0605438	0.143331	-0.087432	-0.0294744	-0.0269521	-0.0126205	-0.0425814	-0.0897577	0.0370379	-0.104321	0.0640606	-0.011901	-0.0433176	-0.0347511	-0.041	-0.0489438	-0.0270615	0.0534265	0.235224	-0.0661907	-0.0598438	0.0369078	0.05051	0.0604281	0.119821	0.00709007	0.00321493	-0.0157563	-0.0546241	-0.0641006	0.0160064	0.016355	0.0342047	0.0479014	-0.0242803	0.20214	0.140456
Prin39	-0.0115291	-0.10474	0.158553	0.0226522	-0.10024	-0.156976	0.0201241	0.0640447	0.223556	-0.261985	-0.0087909	-0.0104872	-0.237021	-0.109784	0.0702057	0.0334585	0.050777	0.0267332	0.00112347	0.0303154	0.12284	0.0282311	0.00425011	-0.0389883	0.0425379	0.0358933	0.0519126	0.0643247	0.101069	0.0911149	0.0118495	0.0239046	0.0291171	-0.0860876	-0.0437297	0.0518655	0.0433665	0.029597	0.0210508	-0.00288847	-0.0325027	-0.0764812	-0.0229706	0.007986	0.0151727	0.0239066	-0.0841767	-0.112155	0.148586
Prin40	0.0382334	-0.0502843	-0.0833176	0.0491217	-0.000338976	-0.359964	-0.0251458	-0.132141	-0.15921	0.0591497	-0.0262585	-0.0490822	-0.278351	0.00870898	0.0346135	-0.0349293	-0.0227402	-0.0384448	-0.0190861	-0.00900231	-0.029134	0.00999981	0.0319469	0.0531601	-0.0125552	-0.00351813	-0.0140124	-0.0429401	0.149137	0.179977	0.0166975	0.0139975	-0.0237923	0.0238133	0.0889126	0.20544	0.305293	0.0220079	0.0215585	0.0307519	0.0479801	0.0566437	-0.0110064	-0.0083037	-0.00988842	-0.0229349	-0.0714307	0.0906682	0.0830227
Prin41	0.0107996	0.0951018	0.0534456	-0.0859068	-0.144203	0.275077	0.0446732	0.0283948	0.00344522	0.069493	-0.0470515	0.00884884	0.222582	-0.0889059	0.155498	-0.0117913	0.0257381	-0.0176584	-0.00997759	-0.02213	-0.0337074	-0.271961	-0.0276014	-0.0753421	-0.0263058	-0.0149574	-0.0139064	-0.0627925	0.143108	-0.132973	0.0308106	0.0267996	-0.0176592	0.069885	0.0107157	-0.0950488	-0.160792	-0.00599112	-0.0119915	-0.029782	-0.0570822	-0.0781708	0.0535373	0.0740784	0.0727786	0.0828021	0.0151633	-0.0290868	0.111371
Prin42	0.0484381	0.0189279	0.0598777	0.0395146	0.178387	-0.0639631	0.0220381	-0.0230697	-0.113367	0.0864741	0.0123032	-0.0605006	0.0727221	-0.0970092	0.0792576	-0.124352	-0.0722853	-0.108482	-0.067279	-0.127197	0.0837496	0.0521189	0.1219	0.00933419	-0.035266	-0.0359108	-0.0237951	0.00906689	-0.147055	0.00731945	0.0775951	0.0493079	-0.02794	-0.014483	0.0121421	0.0532857	0.0765022	0.0035188	0.00223576	-0.00225646	-0.00956257	-0.013183	0.000568689	-0.0290715	-0.0304924	-0.0106289	0.0371282	0.023437	0.291614
Prin43	-0.0368068	0.0151632	0.0657592	-0.121682	0.0113108	-0.136946	-0.0113319	0.0145599	-0.43049	0.481226	-0.000495254	0.00574229	-0.103923	0.0592411	-0.0369571	0.0180459	0.0330997	0.0578371	0.00491619	-0.0268389	0.0491152	-0.167294	0.146642	-0.0818327	0.00359085	0.00493915	0.0135785	0.0179518	0.0205852	0.25076	0.00675957	0.00993462	0.0316429	-0.0368534	-0.0197435	-0.0204875	0.0190442	-0.0531095	-0.0477126	-0.0595915	-0.0681238	-0.0926622	0.0233736	0.047161	0.0704229	0.0933761	-0.0377459	0.0148486	-0.00686172
Prin44	0.0226689	0.0407079	-0.00350013	0.0998322	-0.0604603	0.0462163	-0.0243622	-0.00950186	-0.275402	0.229194	-0.056716	0.00411852	0.0202858	0.00190493	-0.0308325	-0.0013291	-0.0373977	-0.0498549	-0.0189039	0.00358199	-0.089922	0.1692	-0.156291	0.122154	-0.0200156	-0.00574531	-0.023305	-0.0393087	-0.0123422	-0.128496	0.00794327	-0.029242	-0.0389115	0.0276819	0.0267444	0.0475555	-0.00612818	0.0805492	0.0780306	0.0660179	0.0414855	0.0253421	-0.00174625	-0.00493639	-0.00927692	-0.0578633	-0.00708536	0.0376614	-0.0217217
Prin45	0.0316391	0.0207917	0.09337	-0.252174	-0.0354794	-0.0370902	0.0714391	-0.053437	0.00484237	-0.0323557	-0.20006	0.00783503	-0.0568189	0.00305411	-0.0351546	-0.011656	-0.0248628	-0.000519826	-0.0325218	-0.0458971	0.0899083	0.00249255	0.198929	-0.0828805	-0.0386649	-0.0164169	-0.004397	0.0150244	-0.0362813	-0.0895405	-0.114146	-0.00405905	-0.0435118	0.0402905	0.0384894	0.100069	0.0500326	0.0823367	0.0280299	-0.0197882	-0.0663029	-0.137413	0.180607	0.163211	0.135015	0.135158	-0.0268692	0.00573315	-0.0573285
Prin46	0.00640428	0.0498786	0.093664	-0.155085	0.0112905	-0.0409551	-0.00395129	0.0477177	0.0340575	-0.0293702	-0.116076	-0.0655772	0.0413338	-0.0388402	0.0105077	-0.0366066	-0.0441484	-0.055988	-0.0605553	-0.0881383	-0.0520596	0.129694	0.0486183	0.011996	-0.0380059	-0.0106746	-0.023334	-0.0201353	0.0109718	0.102084	0.0357098	0.00859429	0.00430011	0.0332052	0.00990695	-0.0821616	-0.019009	0.0565851	0.0200611	-0.0154323	-0.0619034	-0.106779	0.115863	0.138797	0.125671	0.0626368	-0.0204477	-0.0243146	0.0591582
Prin47	-0.0935427	-0.0227845	-0.00591599	-0.0903206	-0.0276904	0.0932779	-0.280039	-0.000578066	-0.0735095	0.0659292	-0.0689402	-0.021097	0.0472582	-0.0345474	0.0364541	-0.0221596	-0.00589284	-0.00688396	-0.0262715	-0.00506723	0.000252029	0.0662847	0.037408	-0.0159289	-0.0240225	-0.0106825	-0.00812314	-0.0233506	-0.0148579	-0.199847	0.357923	-0.0446812	0.100299	-0.00555348	0.00483056	0.0447278	0.0366756	0.0212894	0.00528219	-0.00459137	-0.0119035	-0.0334489	0.0681898	0.0333462	0.0211132	0.0917131	0.0337944	0.0161825	0.117959
Prin48	-0.0212046	0.0795474	-0.0437276	0.274486	-0.0671532	0.025211	-0.0545658	0.0230784	-0.0158508	-0.0116214	0.0769218	-0.00777664	0.00206539	0.00775291	-0.00433602	-0.0345223	-0.0532204	-0.0421694	-0.0195981	-0.0856505	0.12203	0.00337047	0.231685	-0.0554468	-0.040288	-0.0296154	-0.0164603	0.0231062	-0.0235003	-0.0778873	0.0714956	-0.0354954	-0.0019439	0.0359665	0.0217874	-0.0243508	-0.0200678	0.0258666	0.0364538	0.0552802	0.0593503	0.101615	-0.135045	-0.058482	-0.0508241	-0.246892	-0.015842	0.0164679	0.0015498
Prin49	0.0229777	-0.141838	-0.0592939	0.0156469	-0.055371	0.153779	0.0556728	-0.0746053	-0.0948266	-0.00153933	-0.0715136	-0.0101699	-0.0843552	0.00609116	-0.0138283	-0.0228873	-0.00899641	0.0113614	0.0184372	0.109334	0.066541	0.0404051	0.0667269	-0.0507667	-0.0123641	-0.012211	-0.00724413	-0.024718	-0.092266	-0.575003	-0.0646474	0.0034471	-0.038544	0.00798645	0.11386	0.241683	0.434892	0.0532949	0.0485944	0.0416285	0.0225251	0.00899608	0.0283686	0.00358565	-0.0291134	-0.00945655	0.00827724	-0.028553	0.00157031
Prin50	-0.0239308	0.0573687	-0.237173	-0.10355	-0.0266512	-0.0952562	0.0453393	0.0981042	0.0723375	-0.0262129	-0.22856	-0.0239933	-0.0662885	-0.0345674	0.0106313	0.0135345	0.0160072	0.0125938	0.0247164	-0.000222602	0.108816	-0.0142907	-0.0349016	-0.0111166	0.0149329	0.00798734	0.0239172	0.0385344	-4.6916e-05	0.161162	-0.0172162	-0.00455961	-0.013187	0.0203177	-0.00611514	-0.147197	-0.115096	0.145813	0.115839	0.1093	0.041008	0.0497659	0.0862666	0.0362988	-0.00490118	0.0296971	-0.0646149	-0.0406408	0.0438703
Prin51	-0.00408307	-0.129885	0.122253	-0.0370691	-0.0517693	0.0968961	0.0286535	0.0558957	0.0580936	0.0899955	0.18409	0.0334024	0.0577981	0.124122	-0.0409234	0.024563	0.0030339	-0.0259872	-0.0310227	-0.0458698	-0.249743	0.17331	-0.0401046	0.0279828	-0.00631184	-0.00105197	0.0169178	0.0139433	0.102375	-0.0247692	-0.0172521	0.0139372	0.0243034	-0.120716	-0.057911	-0.0339398	0.159799	-0.152926	-0.13144	-0.111896	-0.0835112	-0.0563103	-0.0670458	-0.0190707	0.0419489	0.0832816	-0.00119462	0.00520706	0.0069735
Prin52	0.0320675	0.128129	0.125177	0.379858	-0.061003	-0.0632151	0.0107719	0.0301505	0.00133282	-0.0286749	0.159618	-0.033376	-0.0088767	-0.0153185	-0.0243275	-0.011226	-0.0202969	-0.018296	-0.0176425	-0.0181532	-0.0416546	-0.059574	0.212064	-0.0232036	-0.0407498	0.00202355	-0.0139273	-0.0335914	-0.0317324	0.0443164	-0.0235826	-0.0209568	-0.0385964	0.100285	0.0484575	-0.067605	-0.098688	-0.00540501	0.00583571	0.0176793	0.0379312	0.059352	-0.0659341	-0.183163	-0.195933	-0.0678884	-0.0599489	-0.00251028	0.000141074
Prin53	0.0735846	0.0653387	-0.13795	-0.0288996	-0.1257	0.0792778	-0.014309	-0.0317108	-0.0604616	-0.0056032	-0.0903544	0.0137032	0.126436	0.0741552	-0.0209907	0.00336661	-0.0455261	-0.0680562	-0.108029	-0.130798	-0.236304	0.149357	0.167647	0.0314262	-0.119186	-0.0504379	0.0277696	0.0679699	0.0313092	0.140911	0.0225105	-0.0113117	-0.0255602	0.053164	0.0109138	0.0223366	-0.0844496	0.0468287	0.049193	0.0503405	0.0381844	0.0498435	0.0517387	-0.00627721	-0.00994143	0.00981488	-0.0574792	0.0122157	-0.0338629
Prin54	0.00555633	0.0834268	0.259275	-0.0158142	-0.116154	-0.0150581	0.0123996	0.0143838	-0.0434242	-0.00344017	-0.000322403	-0.0213986	-0.0766929	-0.0817397	-0.0135949	-0.0325799	-0.0324822	0.0132893	0.090954	-0.201423	0.38963	-0.0933183	-0.0288846	0.0454705	0.0676912	0.00551362	0.0422419	0.0641329	-0.0225963	-0.128704	-0.0253364	-0.0493543	-0.0356726	0.0110486	0.0153017	0.00277239	0.0126638	0.0482197	0.0228826	-0.0126065	-0.0336712	-0.08058	0.00191785	-0.0107599	-0.00348393	0.0489687	-0.0623798	-0.0162675	-0.0968659
Prin55	0.028601	0.182931	0.175623	-0.00527445	-0.0228798	-0.0739623	-0.00606403	0.0224512	-0.00699439	-0.0443768	-0.0603882	-0.0505662	-0.060945	-0.12198	0.0128624	-0.036684	0.0309044	0.0858129	-0.0159592	0.142578	-0.304216	-0.161262	0.203555	0.0650179	0.0100052	0.00371178	0.0142679	0.0299317	-0.0539401	-0.0869728	0.0546896	-0.00662117	-0.0454712	0.146026	0.0958063	-0.045683	-0.119076	0.0759032	0.0474949	0.0122465	-0.0129903	-0.054019	0.0213968	0.027313	0.00629083	-0.0211798	-0.038109	-0.0398059	0.0872274
Prin56	0.00192214	-0.0112283	-0.0397215	0.0691806	0.00884293	-0.0185035	0.00919364	-0.0151476	-0.0156786	-0.0137287	-0.00950172	-0.021026	-0.0215653	-0.0916536	0.0097556	-0.0756964	0.0239157	0.092338	-0.00910145	-0.0345934	-0.0451059	-0.0534912	0.0979162	0.0690632	0.0359182	0.0211021	0.0380371	0.033884	0.00420153	-0.0406042	-0.00163138	-0.0166503	-0.00306952	0.0993517	0.00929196	-0.00932353	-0.0325641	0.0251702	0.0297132	0.0325382	0.0289675	0.0353705	-0.0459859	-0.0382216	-0.0567196	-0.0504902	-0.0188596	0.0141896	-0.0165147
Prin57	0.0153794	0.0970046	0.222493	0.0514545	-0.0257832	-0.0914442	-0.00966112	0.0115125	-0.0168555	-0.032001	-0.0422315	-0.0514889	-0.0421972	-0.00487814	-0.0222779	0.072068	-0.0537611	-0.0886206	-0.0236086	0.215563	0.194416	0.153404	-0.335953	-0.192063	0.0179313	0.00343124	0.016424	-0.0267731	-0.131214	0.0431652	0.0302478	-0.0341613	-0.0405832	0.10262	0.0311369	-0.0409597	-0.0859133	0.0814304	0.0582491	0.0102365	-0.0280732	-0.0752498	0.0530471	0.0322928	0.0193988	-0.0128078	-0.0273725	0.00302718	0.0809127
Prin58	-0.0103342	0.019398	0.00108671	-0.119513	-0.0264909	0.0144197	-0.00873684	-0.0160484	-0.0113543	-0.00836122	-0.0815568	-0.0246223	-0.0761441	0.0610508	-0.055333	0.120019	-9.5111e-05	-0.0992367	0.0921276	0.0124772	-0.0749024	-0.208548	0.308023	0.0863266	-0.0291727	-0.0201172	-0.05949	0.00306833	0.00826177	-0.080365	0.0184424	-0.00617021	0.00443172	0.0894549	0.0390251	0.00255546	-0.0405568	0.0289575	0.00799602	0.00109198	0.00116345	-0.018847	0.0662709	0.0441583	0.0622232	0.0241799	-0.0472749	0.00706353	0.0612211
[truncated: 47 more columns]

## Sheet: WS2 - Means, S.D.
WS2. Means and standard deviations of PC scores and the natural log of centroid size for the DGRP data by laboratory and sex.
Lab	Sex	Statistic	N	Prin1	Prin2	Prin3	Prin4	Prin5	Prin6	Prin7	Prin8	Prin9	Prin10	Prin11	Prin12	Prin13	Prin14	Prin15	Prin16	Prin17	Prin18	Prin19	Prin20	Prin21	Prin22	Prin23	Prin24	Prin25	Prin26	Prin27	Prin28	Prin29	Prin30	Prin31	Prin32	Prin33	Prin34	Prin35	Prin36	Prin37	Prin38	Prin39	Prin40	Prin41	Prin42	Prin43	Prin44	Prin45	Prin46
Dworkin	F	Mean	8208	0.0849106	-1.23761	-0.0416426	-0.164466	-0.553005	-0.132025	0.066791	0.0655762	-0.0702162	-0.173385	-0.0550787	-0.0132635	0.0507412	-0.030177	-0.00782442	0.0618177	-0.0021446	0.00640626	-0.0365486	0.0162299	-0.0151303	0.0231377	0.0215778	-0.00656617	0.0207445	-0.0274767	-0.00260763	-0.00276981	0.0245045	-0.00392888	-0.0138994	-0.010704	0.0221697	-0.0091774	-0.00749666	-0.00912596	0.00658892	0.00855431	-0.0123606	0.00416273	-0.00660097	0.00333892	-0.00763019	-0.00248207	-0.00541294	-0.00112963
Dworkin	F	S.D.		1.03964	1.02815	0.92588	0.778188	0.663576	0.623048	0.485884	0.400264	0.427482	0.35466	0.33947	0.340248	0.261165	0.271461	0.264396	0.221705	0.207807	0.201682	0.1659	0.175336	0.146684	0.149507	0.135046	0.127447	0.106511	0.0899717	0.100125	0.10452	0.110242	0.0797128	0.096227	0.0906765	0.0918152	0.0823546	0.0830795	0.0746646	0.0597116	0.0735752	0.0660535	0.0628474	0.0569277	0.0517826	0.0602925	0.0527456	0.0443842	0.0438841
Dworkin	M	Mean	8474	0.989832	-0.318264	0.484685	-0.464677	-0.0751302	0.0746395	0.134951	0.155351	-0.1477	-0.0793964	-0.0199691	-0.00551315	-0.0321792	-0.0510917	0.044932	0.0229653	0.0300636	0.0261606	-0.00450053	-0.0242478	0.002226	-0.0240154	0.0145931	-0.000897254	0.0298895	-0.0170754	-0.0146165	0.0259508	0.0140437	-0.00443997	0.00417908	-0.00142527	0.019216	-0.00977046	-0.00997785	-0.00425539	0.00807463	0.00137717	-0.00668325	-0.00228711	-0.00542477	-0.00434206	0.000540693	0.00727179	0.000266394	0.00209788
Dworkin	M	S.D.		1.00729	0.966101	0.951637	0.748769	0.641084	0.623142	0.479594	0.391526	0.411713	0.354034	0.324479	0.316217	0.262672	0.253289	0.236638	0.223305	0.201508	0.19972	0.1609	0.168921	0.14546	0.15249	0.130621	0.120377	0.102984	0.0903544	0.0993471	0.099385	0.109996	0.0760962	0.0878571	0.0892308	0.0899164	0.0814542	0.0787861	0.0722951	0.0583645	0.0694819	0.0649118	0.0599468	0.0576172	0.050718	0.0579099	0.0491606	0.0423247	0.0406799
Houle	F	Mean	4021	-0.954648	-0.0577098	-0.793096	-0.233253	-0.185656	-0.0550708	-0.0255023	-0.220522	0.061568	-0.0678661	-0.0320208	0.138518	-0.0656244	0.0476274	-0.0829822	-0.100883	-0.104747	0.0146535	0.0851929	-0.020056	-0.00193361	0.0456047	0.0478862	-0.00199573	-0.0523975	0.0517596	0.0146985	-0.00443407	-0.0174177	-0.0462384	0.0034504	0.028848	-0.0280591	0.031913	0.0346412	-0.0171653	-0.00642524	0.00458689	0.0208184	0.00874565	-0.0150781	0.00751936	-0.0292904	0.0141585	-0.0318553	-0.0100007
Houle	F	S.D.		1.10362	1.01379	0.968842	0.7802	0.718178	0.661165	0.497905	0.481234	0.374418	0.370621	0.378655	0.307414	0.229937	0.261275	0.270166	0.239307	0.208296	0.199113	0.18715	0.182107	0.192795	0.167899	0.144483	0.139811	0.123571	0.122499	0.109013	0.111575	0.111548	0.0872092	0.100978	0.0935877	0.0948488	0.0932887	0.0851367	0.081269	0.065552	0.0824151	0.0676325	0.0636663	0.0625172	0.0752608	0.0614232	0.0579851	0.0521538	0.0490288
Houle	M	Mean	3969	-0.115492	0.943911	-0.241034	-0.591166	0.286064	0.207959	0.134961	-0.0596565	0.0333445	-0.0404179	-0.0094881	0.136082	-0.131684	0.00145141	-0.0163116	-0.105824	-0.0828254	0.0528085	0.0687634	-0.0381849	-0.0129345	0.0320637	0.046611	0.0244918	-0.0490539	0.0801913	0.0413924	0.0136664	-0.0164552	-0.0336447	0.0111485	0.0534811	-0.0414495	0.0310624	0.0168087	-0.00983482	0.000213357	-0.0130064	0.0197388	0.0145312	-0.00796832	-0.00289678	-0.0141482	0.0212767	-0.0283275	-0.0240806
Houle	M	S.D.		1.07045	0.986618	0.952844	0.803324	0.712613	0.648248	0.491383	0.466246	0.359949	0.364295	0.378555	0.312511	0.236121	0.257194	0.237399	0.233654	0.204545	0.197065	0.190909	0.182785	0.194617	0.180271	0.152994	0.132763	0.124703	0.125401	0.109668	0.116172	0.111535	0.0888715	0.0983183	0.0890864	0.0934424	0.0937761	0.0814857	0.0792782	0.0683787	0.0774909	0.0696731	0.0637927	0.0584224	0.0676653	0.0565548	0.0546261	0.0523708	0.0488612
[truncated: 13 more columns]

## Sheet: WS3 - G 40 dimensions
WS3. Among-line genetic variance-covariance matrix estimated for the scores on the first 39 among-line eigenvectors shown in WS1, plus log centroid size.
VARIABLE	Prin1	Prin2	Prin3	Prin4	Prin5	Prin6	Prin7	Prin8	Prin9	Prin10	Prin11	Prin12	Prin13	Prin14	Prin15	Prin16	Prin17	Prin18	Prin19	Prin20	Prin21	Prin22	Prin23	Prin24	Prin25	Prin26	Prin27	Prin28	Prin29	Prin30	Prin31	Prin32	Prin33	Prin34	Prin35	Prin36	Prin37	Prin38	Prin39	lncs
Prin1	0.79142	0.15248	-0.12104	0.16591	-0.0040128	-0.062665	-0.037818	0.043178	0.026208	-0.015658	-0.0042895	-0.024182	0.024139	0.053683	-0.012502	-0.0081731	-0.021298	0.0096732	0.014654	-0.0042924	-0.018284	-0.013344	0.022973	0.013747	-0.014059	0.0053289	0.0006783	0.0010453	-0.0061311	-0.0028084	-0.0084618	0.0027501	0.0032468	0.00040319	-0.0011532	0.004729	-0.0013567	-0.0020188	-0.00076464	-0.0043989
Prin2	0.15248	0.70279	0.17815	-0.084402	-0.2352	-0.052968	-0.0061881	-0.031791	-0.038486	-0.041497	-0.0024477	-0.01013	0.013983	0.028128	0.010252	0.013275	-0.007427	0.0010579	-0.0042104	0.018987	-0.016231	0.011289	0.0067838	-0.0098331	0.0011873	-0.0076133	0.01127	-0.0021193	-0.001362	-0.007564	-0.004164	-0.011412	0.0027014	0.0047964	-0.010185	0.00017044	-0.0018911	0.0026012	-0.0011841	-0.0076832
Prin3	-0.12104	0.17815	0.69824	0.21065	-0.087865	-0.07823	0.023793	-0.032099	-0.031033	-0.032052	-0.013314	0.0050276	-0.012658	0.0086968	0.0018154	-0.00027195	-0.018416	0.00096998	-0.00085571	-0.0041605	0.0092753	0.025678	-0.0013579	0.0031311	0.0087438	0.0051272	0.0011301	-0.005795	-0.0081096	0.0050795	0.0071951	0.0051272	0.0030678	0.003849	0.0065951	0.001834	0.0014704	0.0023556	0.0025546	-0.0014852
Prin4	0.16591	-0.084402	0.21065	0.41031	-0.083928	0.0099877	0.044644	0.0069047	0.01883	0.0097472	-0.025879	0.010973	0.0058699	0.0017286	0.0072109	0.0055424	-0.0075431	-0.00017059	0.0022102	-0.0041244	0.0023004	0.0049693	0.013648	0.0040646	-0.0050507	0.0098493	-0.002327	-0.00026564	0.00058786	0.0031034	-0.0022861	0.012646	0.00099303	-0.0019754	0.0014903	0.0019636	0.0046223	0.0016499	-0.0018485	0.0035957
Prin5	-0.0040128	-0.2352	-0.087865	-0.083928	0.29713	0.014473	0.023788	0.009221	0.017076	-0.015894	0.0082868	5.7165e-05	-0.012846	-0.002548	-0.012144	0.0052945	0.007278	-0.00024523	0.0029097	-0.0027975	0.0062323	0.0027441	-0.0041498	0.0028787	0.0053283	-0.0028898	-0.0046561	0.00063109	0.0038858	0.0034262	0.0026894	-6.5675e-05	0.0013119	0.00023717	0.0081143	0.0015864	-0.0020694	-0.00044849	0.0015788	0.0045541
Prin6	-0.062665	-0.052968	-0.07823	0.0099877	0.014473	0.27301	-0.023085	0.016715	0.015921	-0.017859	0.012612	-0.01251	-0.0072043	0.0044186	-0.0080196	0.009274	-0.0020961	0.0047422	0.0020933	-0.0028339	0.00022101	-0.0046448	0.00043044	-0.0017134	0.0026376	-0.0063441	-0.002656	-0.0023779	0.0041312	0.0021795	-0.0015877	0.00011385	-8.5448e-05	-0.00074856	0.00076545	0.0018355	0.00036924	0.0019524	0.00083834	7.9253e-05
Prin7	-0.037818	-0.0061881	0.023793	0.044644	0.023788	-0.023085	0.1615	-0.027748	-0.0035731	0.014468	0.0048025	-0.0016208	0.0018036	-0.0030705	0.0064893	0.0046865	-5.4887e-05	-0.0005705	-0.0037011	0.0059048	0.0039313	0.0069929	-0.00093568	-0.0073098	-0.0052039	0.0024247	-0.0025541	-0.003184	0.0027845	0.0032254	0.0040496	0.0013639	0.00079527	-0.0028977	-0.0032641	-0.0039906	-0.0012163	0.00034381	0.00013721	-0.00036609
Prin8	0.043178	-0.031791	-0.032099	0.0069047	0.009221	0.016715	-0.027748	0.099894	0.012359	0.024257	0.0047941	0.0083644	-0.0076279	0.0063068	-0.0074895	-0.00023605	-0.0085226	-0.0033232	0.00026638	0.0037987	-0.0010964	-0.0029959	-0.0036042	0.0011948	0.0019038	-0.0022359	-0.0052153	0.00081947	-0.0036349	-0.00022048	-0.0034878	0.0019695	0.00035912	0.0016496	0.0033668	-0.0012452	0.0011497	-0.0019386	0.0010527	-4.9954e-05
Prin9	0.026208	-0.038486	-0.031033	0.01883	0.017076	0.015921	-0.0035731	0.012359	0.064128	-0.014604	-0.0053036	-0.0068195	-0.0023649	-0.0069125	0.0038646	0.0041364	-0.00047605	0.00045866	0.001498	-0.0042675	0.0012801	-0.00095015	0.0031342	-0.00025793	0.0027709	-0.0017144	-0.0016382	-0.00093791	0.00337	-0.0013632	-0.0022946	0.0038888	0.00017062	-0.0017387	5.2576e-05	0.0020115	-0.00019892	0.0011801	-0.0012144	-0.00044965
Prin10	-0.015658	-0.041497	-0.032052	0.0097472	-0.015894	-0.017859	0.014468	0.024257	-0.014604	0.077445	-0.0033406	-0.001699	-0.0027274	0.0007243	0.003452	0.0029461	-0.0029497	-0.0018969	-0.0014591	0.00092542	0.0023435	-0.004102	0.00086231	-0.0025741	-0.00054031	0.0010884	-8.758e-05	0.0024498	-0.0025395	0.0012844	-0.0016404	0.0016297	-0.0024089	0.00054414	0.00032768	-0.003022	-0.00036867	0.00065983	0.00015653	-0.0004799
Prin11	-0.0042895	-0.0024477	-0.013314	-0.025879	0.0082868	0.012612	0.0048025	0.0047941	-0.0053036	-0.0033406	0.067366	-0.0017829	-0.007523	-0.0067022	-0.0042883	0.0034692	0.00018818	-0.0058169	0.0015218	0.0017453	0.0024607	-0.0017745	0.0012746	0.00024231	0.0033812	-0.0017195	0.0010481	-0.0024795	-0.00058917	-0.00041511	0.00020514	-0.0001561	-0.00056532	-0.0010224	0.0002105	-0.00020589	0.0019325	-0.00076924	0.00098324	0.0010116
Prin12	-0.024182	-0.01013	0.0050276	0.010973	5.7165e-05	-0.01251	-0.0016208	0.0083644	-0.0068195	-0.001699	-0.0017829	0.045367	0.0036208	0.00087666	0.0035224	-0.0040284	0.00023424	-0.00048096	-0.0053168	0.0019004	0.0011413	-0.00061982	-0.0039555	0.0012874	0.0032719	0.0014419	-0.00056196	0.0013227	-0.00071144	0.0017026	5.2709e-05	-0.0024541	-0.0011112	0.0003598	-0.00021607	-0.00037419	5.8974e-05	0.0011564	-5.8276e-05	0.00038467
Prin13	0.024139	0.013983	-0.012658	0.0058699	-0.012846	-0.0072043	0.0018036	-0.0076279	-0.0023649	-0.0027274	-0.007523	0.0036208	0.024196	0.00082879	-0.00084866	-0.0050358	-0.0051038	0.0015786	0.0025473	0.00043777	-0.0037874	0.00046743	-0.00082178	0.00088239	-0.0018242	-0.00012887	-0.0015339	0.00055509	0.0017428	-0.0017124	6.9525e-05	0.00016591	-0.00044085	0.00029518	-0.0017298	-0.00029809	-0.0009051	-6.8704e-05	0.00045054	0.00051839
Prin14	0.053683	0.028128	0.0086968	0.0017286	-0.002548	0.0044186	-0.0030705	0.0063068	-0.0069125	0.0007243	-0.0067022	0.00087666	0.00082879	0.036887	-0.00096078	0.006814	-0.0040217	0.0036895	-0.00074988	-0.00039842	-0.0033714	-0.0023807	-0.00069511	0.0020117	-0.00025225	0.001001	0.0013212	-0.00053065	-0.0012553	-0.00013364	0.00013033	-0.0010219	0.0024668	0.0017369	0.0011072	-0.0011257	-0.000209	0.00023734	0.00044404	-0.00094949
Prin15	-0.012502	0.010252	0.0018154	0.0072109	-0.012144	-0.0080196	0.0064893	-0.0074895	0.0038646	0.003452	-0.0042883	0.0035224	-0.00084866	-0.00096078	0.031908	-0.00095349	-0.00053619	0.0025227	0.00038043	-0.0016449	-0.00065465	-0.0031247	-0.00063179	0.001686	0.00073024	0.00097855	-0.00018469	-0.0001082	-1.2224e-05	-0.00059695	-0.00061763	0.0017248	-0.00016312	-0.0017438	0.00076666	-0.0010237	-0.00051631	6.5034e-05	-0.00010768	-8.0991e-05
Prin16	-0.0081731	0.013275	-0.00027195	0.0055424	0.0052945	0.009274	0.0046865	-0.00023605	0.0041364	0.0029461	0.0034692	-0.0040284	-0.0050358	0.006814	-0.00095349	0.031345	-0.0081849	-0.0029745	0.0013383	0.0017173	0.00053486	-0.0032127	6.8115e-05	-0.001406	-0.00097351	-0.00023863	0.0022672	-0.0010042	0.0013684	-0.0017058	8.1971e-05	-0.00019483	0.00051207	-0.00056277	0.00027186	-0.00076291	-0.00018654	0.00061493	0.0015807	-0.00032222
Prin17	-0.021298	-0.007427	-0.018416	-0.0075431	0.007278	-0.0020961	-5.4887e-05	-0.0085226	-0.00047605	-0.0029497	0.00018818	0.00023424	-0.0051038	-0.0040217	-0.00053619	-0.0081849	0.023648	0.00040811	-0.0021497	-0.0023538	0.00079221	0.0026656	0.00055298	-0.0020379	0.00045557	0.00055906	-6.4414e-05	0.00051435	-0.0003333	-0.00045896	0.00094149	0.0012369	-0.00062043	0.00057597	-8.5365e-05	0.0004129	0.00071755	-0.00013148	-0.0010943	0.00032044
Prin18	0.0096732	0.0010579	0.00096998	-0.00017059	-0.00024523	0.0047422	-0.0005705	-0.0033232	0.00045866	-0.0018969	-0.0058169	-0.00048096	0.0015786	0.0036895	0.0025227	-0.0029745	0.00040811	0.017437	0.0019817	-0.0027345	-0.003192	0.00070516	-0.00030027	0.0020006	0.0012356	8.2716e-05	-0.0012171	-0.00029675	0.00043256	0.00045523	0.0001784	-0.0011991	-0.00032411	-0.00085371	0.00027377	0.00046288	0.00017433	0.00053149	-0.00045482	-0.00011801
Prin19	0.014654	-0.0042104	-0.00085571	0.0022102	0.0029097	0.0020933	-0.0037011	0.00026638	0.001498	-0.0014591	0.0015218	-0.0053168	0.0025473	-0.00074988	0.00038043	0.0013383	-0.0021497	0.0019817	0.01038	-0.0014923	-0.0015137	-0.0047834	0.00012507	0.00043913	0.00063464	0.00046009	-0.00061886	-0.00029446	1.6591e-06	-0.00018515	-0.00011429	0.00026808	0.00034005	-0.00070088	0.00034099	0.00084164	4.2235e-05	0.00036119	-0.00021619	0.00031714
Prin20	-0.0042924	0.018987	-0.0041605	-0.0041244	-0.0027975	-0.0028339	0.0059048	0.0037987	-0.0042675	0.00092542	0.0017453	0.0019004	0.00043777	-0.00039842	-0.0016449	0.0017173	-0.0023538	-0.0027345	-0.0014923	0.018238	-0.0022736	-0.00084499	0.0019171	-0.00055923	-0.00023226	-0.0011128	0.0018345	0.00051868	0.00091069	0.0010938	6.7471e-05	-0.00071895	-0.00013382	0.00029602	0.00052381	-0.00095347	-7.6959e-05	-0.00033994	-0.00034341	-0.00012386
Prin21	-0.018284	-0.016231	0.0092753	0.0023004	0.0062323	0.00022101	0.0039313	-0.0010964	0.0012801	0.0023435	0.0024607	0.0011413	-0.0037874	-0.0033714	-0.00065465	0.00053486	0.00079221	-0.003192	-0.0015137	-0.0022736	0.012985	0.001588	-0.0013866	0.00036789	0.00083818	-0.00056544	0.00076085	-0.00047163	-0.00018248	0.00033226	0.00030615	0.0010225	0.00030207	-0.00076942	0.0019935	-1.5028e-05	-5.3638e-05	0.00037115	-0.00070529	7.706e-05
Prin22	-0.013344	0.011289	0.025678	0.0049693	0.0027441	-0.0046448	0.0069929	-0.0029959	-0.00095015	-0.004102	-0.0017745	-0.00061982	0.00046743	-0.0023807	-0.0031247	-0.0032127	0.0026656	0.00070516	-0.0047834	-0.00084499	0.001588	0.016951	-0.0024538	-0.0021592	-0.0012367	-0.00037706	-0.0024919	-0.00071886	0.00075327	0.00065898	0.001197	-0.00011387	0.00040829	0.0015962	0.00030079	0.00085275	0.00048783	-0.00030781	-0.00032412	0.0006363
Prin23	0.022973	0.0067838	-0.0013579	0.013648	-0.0041498	0.00043044	-0.00093568	-0.0036042	0.0031342	0.00086231	0.0012746	-0.0039555	-0.00082178	-0.00069511	-0.00063179	6.8115e-05	0.00055298	-0.00030027	0.00012507	0.0019171	-0.0013866	-0.0024538	0.0095978	0.0015401	0.00039201	0.00034851	-0.00018433	-0.0020531	-1.5065e-05	3.147e-05	0.00017064	-0.00024631	-0.00052988	-5.2118e-05	-0.00063694	0.0012673	6.1409e-05	4.621e-06	-0.00081217	-0.00043306
Prin24	0.013747	-0.0098331	0.0031311	0.0040646	0.0028787	-0.0017134	-0.0073098	0.0011948	-0.00025793	-0.0025741	0.00024231	0.0012874	0.00088239	0.0020117	0.001686	-0.001406	-0.0020379	0.0020006	0.00043913	-0.00055923	0.00036789	-0.0021592	0.0015401	0.0074731	-0.00055213	-0.00022186	4.9736e-05	-0.00023237	-0.00061227	-0.00038139	-0.0005387	0.00035322	0.00091221	-0.00035803	0.00080117	-8.7301e-05	-0.00022256	-0.00075517	0.00015255	0.00014701
Prin25	-0.014059	0.0011873	0.0087438	-0.0050507	0.0053283	0.0026376	-0.0052039	0.0019038	0.0027709	-0.00054031	0.0033812	0.0032719	-0.0018242	-0.00025225	0.00073024	-0.00097351	0.00045557	0.0012356	0.00063464	-0.00023226	0.00083818	-0.0012367	0.00039201	-0.00055213	0.0060472	-0.00042958	0.00049859	-0.00075758	-0.00029383	-0.00070685	0.00029825	-0.00053822	-0.0010776	-0.00021186	0.00025393	0.00023213	0.00019889	0.00066062	-0.00042623	0.00029019
Prin26	0.0053289	-0.0076133	0.0051272	0.0098493	-0.0028898	-0.0063441	0.0024247	-0.0022359	-0.0017144	0.0010884	-0.0017195	0.0014419	-0.00012887	0.001001	0.00097855	-0.00023863	0.00055906	8.2716e-05	0.00046009	-0.0011128	-0.00056544	-0.00037706	0.00034851	-0.00022186	-0.00042958	0.0042445	-0.00027466	-0.0011865	-0.00058727	0.0010279	-0.00030463	-0.00025873	0.00022708	-0.00024507	-0.00047661	-0.0003253	-0.0002826	0.00010141	-0.0004363	-0.00018139
Prin27	0.0006783	0.01127	0.0011301	-0.002327	-0.0046561	-0.002656	-0.0025541	-0.0052153	-0.0016382	-8.758e-05	0.0010481	-0.00056196	-0.0015339	0.0013212	-0.00018469	0.0022672	-6.4414e-05	-0.0012171	-0.00061886	0.0018345	0.00076085	-0.0024919	-0.00018433	4.9736e-05	0.00049859	-0.00027466	0.0042863	0.0016283	-0.00092488	0.00062729	-0.00044988	-0.00034158	0.00034489	-3.2815e-05	0.00035672	1.4138e-05	8.395e-05	0.00055103	-0.00014962	-0.00011909
Prin28	0.0010453	-0.0021193	-0.005795	-0.00026564	0.00063109	-0.0023779	-0.003184	0.00081947	-0.00093791	0.0024498	-0.0024795	0.0013227	0.00055509	-0.00053065	-0.0001082	-0.0010042	0.00051435	-0.00029675	-0.00029446	0.00051868	-0.00047163	-0.00071886	-0.0020531	-0.00023237	-0.00075758	-0.0011865	0.0016283	0.0048133	-1.2314e-05	-7.1517e-05	-0.00081455	0.00035158	-4.759e-05	0.00049072	0.00020112	-0.00026108	0.0004634	0.0005581	0.000613	0.00046563
Prin29	-0.0061311	-0.001362	-0.0081096	0.00058786	0.0038858	0.0041312	0.0027845	-0.0036349	0.00337	-0.0025395	-0.00058917	-0.00071144	0.0017428	-0.0012553	-1.2224e-05	0.0013684	-0.0003333	0.00043256	1.6591e-06	0.00091069	-0.00018248	0.00075327	-1.5065e-05	-0.00061227	-0.00029383	-0.00058727	-0.00092488	-1.2314e-05	0.00498	-0.0004601	-0.00064027	-9.9401e-05	-0.00063499	0.00036049	-7.1618e-05	0.00037127	-0.00027984	2.6011e-05	-9.1407e-05	0.00039982
Prin30	-0.0028084	-0.007564	0.0050795	0.0031034	0.0034262	0.0021795	0.0032254	-0.00022048	-0.0013632	0.0012844	-0.00041511	0.0017026	-0.0017124	-0.00013364	-0.00059695	-0.0017058	-0.00045896	0.00045523	-0.00018515	0.0010938	0.00033226	0.00065898	3.147e-05	-0.00038139	-0.00070685	0.0010279	0.00062729	-7.1517e-05	-0.0004601	0.0030063	0.0006253	-0.00069889	0.00061107	-0.00022755	0.00010341	-0.00030242	-0.00064372	0.00050488	-0.00026428	-0.00016304
Prin31	-0.0084618	-0.004164	0.0071951	-0.0022861	0.0026894	-0.0015877	0.0040496	-0.0034878	-0.0022946	-0.0016404	0.00020514	5.2709e-05	6.9525e-05	0.00013033	-0.00061763	8.1971e-05	0.00094149	0.0001784	-0.00011429	6.7471e-05	0.00030615	0.001197	0.00017064	-0.0005387	0.00029825	-0.00030463	-0.00044988	-0.00081455	-0.00064027	0.0006253	0.0034592	0.00032924	8.3046e-05	-0.0004112	-0.00095025	0.00011595	0.00023662	-0.00019835	0.0002388	-1.4098e-05
Prin32	0.0027501	-0.011412	0.0051272	0.012646	-6.5675e-05	0.00011385	0.0013639	0.0019695	0.0038888	0.0016297	-0.0001561	-0.0024541	0.00016591	-0.0010219	0.0017248	-0.00019483	0.0012369	-0.0011991	0.00026808	-0.00071895	0.0010225	-0.00011387	-0.00024631	0.00035322	-0.00053822	-0.00025873	-0.00034158	0.00035158	-9.9401e-05	-0.00069889	0.00032924	0.0034772	0.00041066	-0.000664	-8.4041e-05	-5.9339e-05	0.00043271	-0.00010856	3.1328e-05	6.7031e-05
Prin33	0.0032468	0.0027014	0.0030678	0.00099303	0.0013119	-8.5448e-05	0.00079527	0.00035912	0.00017062	-0.0024089	-0.00056532	-0.0011112	-0.00044085	0.0024668	-0.00016312	0.00051207	-0.00062043	-0.00032411	0.00034005	-0.00013382	0.00030207	0.00040829	-0.00052988	0.00091221	-0.0010776	0.00022708	0.00034489	-4.759e-05	-0.00063499	0.00061107	8.3046e-05	0.00041066	0.0033564	0.00027674	0.00036868	-0.00019051	-0.00044733	-0.00042782	1.2207e-05	0.00014991
Prin34	0.00040319	0.0047964	0.003849	-0.0019754	0.00023717	-0.00074856	-0.0028977	0.0016496	-0.0017387	0.00054414	-0.0010224	0.0003598	0.00029518	0.0017369	-0.0017438	-0.00056277	0.00057597	-0.00085371	-0.00070088	0.00029602	-0.00076942	0.0015962	-5.2118e-05	-0.00035803	-0.00021186	-0.00024507	-3.2815e-05	0.00049072	0.00036049	-0.00022755	-0.0004112	-0.000664	0.00027674	0.0031903	2.6202e-05	0.00071593	-8.9665e-05	0.00013503	-0.00042422	1.119e-05
Prin35	-0.0011532	-0.010185	0.0065951	0.0014903	0.0081143	0.00076545	-0.0032641	0.0033668	5.2576e-05	0.00032768	0.0002105	-0.00021607	-0.0017298	0.0011072	0.00076666	0.00027186	-8.5365e-05	0.00027377	0.00034099	0.00052381	0.0019935	0.00030079	-0.00063694	0.00080117	0.00025393	-0.00047661	0.00035672	0.00020112	-7.1618e-05	0.00010341	-0.00095025	-8.4041e-05	0.00036868	2.6202e-05	0.0032752	-7.098e-05	-0.00056549	0.00022617	-0.00018095	3.6046e-05
Prin36	0.004729	0.00017044	0.001834	0.0019636	0.0015864	0.0018355	-0.0039906	-0.0012452	0.0020115	-0.003022	-0.00020589	-0.00037419	-0.00029809	-0.0011257	-0.0010237	-0.00076291	0.0004129	0.00046288	0.00084164	-0.00095347	-1.5028e-05	0.00085275	0.0012673	-8.7301e-05	0.00023213	-0.0003253	1.4138e-05	-0.00026108	0.00037127	-0.00030242	0.00011595	-5.9339e-05	-0.00019051	0.00071593	-7.098e-05	0.0026619	0.00080101	0.00021394	-8.879e-05	-7.2451e-05
Prin37	-0.0013567	-0.0018911	0.0014704	0.0046223	-0.0020694	0.00036924	-0.0012163	0.0011497	-0.00019892	-0.00036867	0.0019325	5.8974e-05	-0.0009051	-0.000209	-0.00051631	-0.00018654	0.00071755	0.00017433	4.2235e-05	-7.6959e-05	-5.3638e-05	0.00048783	6.1409e-05	-0.00022256	0.00019889	-0.0002826	8.395e-05	0.0004634	-0.00027984	-0.00064372	0.00023662	0.00043271	-0.00044733	-8.9665e-05	-0.00056549	0.00080101	0.0015447	-0.00040568	9.1817e-05	0.00028464
Prin38	-0.0020188	0.0026012	0.0023556	0.0016499	-0.00044849	0.0019524	0.00034381	-0.0019386	0.0011801	0.00065983	-0.00076924	0.0011564	-6.8704e-05	0.00023734	6.5034e-05	0.00061493	-0.00013148	0.00053149	0.00036119	-0.00033994	0.00037115	-0.00030781	4.621e-06	-0.00075517	0.00066062	0.00010141	0.00055103	0.0005581	2.6011e-05	0.00050488	-0.00019835	-0.00010856	-0.00042782	0.00013503	0.00022617	0.00021394	-0.00040568	0.0019918	-0.00025384	-9.7424e-05
Prin39	-0.00076464	-0.0011841	0.0025546	-0.0018485	0.0015788	0.00083834	0.00013721	0.0010527	-0.0012144	0.00015653	0.00098324	-5.8276e-05	0.00045054	0.00044404	-0.00010768	0.0015807	-0.0010943	-0.00045482	-0.00021619	-0.00034341	-0.00070529	-0.00032412	-0.00081217	0.00015255	-0.00042623	-0.0004363	-0.00014962	0.000613	-9.1407e-05	-0.00026428	0.0002388	3.1328e-05	1.2207e-05	-0.00042422	-0.00018095	-8.879e-05	9.1817e-05	-0.00025384	0.0013567	-4.4066e-05
ln(cs)	-0.0043989	-0.0076832	-0.0014852	0.0035957	0.0045541	7.9253e-05	-0.00036609	-4.9954e-05	-0.00044965	-0.0004799	0.0010116	0.00038467	0.00051839	-0.00094949	-8.0991e-05	-0.00032222	0.00032044	-0.00011801	0.00031714	-0.00012386	7.706e-05	0.0006363	-0.00043306	0.00014701	0.00029019	-0.00018139	-0.00011909	0.00046563	0.00039982	-0.00016304	-1.4098e-05	6.7031e-05	0.00014991	1.119e-05	3.6046e-05	-7.2451e-05	0.00028464	-9.7424e-05	-4.4066e-05	0.0012797

## Sheet: WS4 - G 97 dimensions
WS4. The 40-dimensional genetic variance-covariance matrix given in WS2, backprojected onto the original 97 variables using the eigenvectors in WS3. This matrix has variation in just 40 dimensions.
The 97 variables are centroid size, plus the Procrustes-aligned x and y coordinates of the 48 landmarks and semi-landmarks shown in Fig 1.
VARIABLE	X1	X2	X3	X4	X5	X6	X7	X8	X9	X10	X11	X12	X13	X14	X15	X16	X17	X18	X19	X20	X21	X22	X23	X24	X25	X26	X27	X28	X29	X30	X31	X32	X33	X34	X35	X36	X37	X38	X39	X40	X41	X42	X43	X44	X45	X46	X47	X48	Y1
X1	0.173739	-0.016204	-0.0349193	0.0366944	-0.0116175	-0.0307135	0.106793	0.0566212	-0.0404993	-0.0438735	-0.025902	-0.0262668	-0.0231104	-0.00900823	-0.00371851	-0.00752709	-0.00943234	-0.0073377	-0.0121632	-0.0149751	-0.0186624	-0.0334606	-0.0212115	-0.0157731	-0.00796957	-0.0053333	-0.00370979	-0.00323055	-0.0129738	-0.0284885	0.135981	0.058966	0.0157798	-0.00782322	-0.0101386	-0.0138887	-0.0175438	-0.0348261	-0.0334555	-0.0318427	-0.0303252	-0.0285003	0.0235375	0.0137562	0.00218938	-0.00982049	-0.0201903	0.0823785	-0.0199464
X2	-0.016204	0.0546421	0.0373928	-0.0374063	-0.000333452	0.000180522	-0.036828	-0.0281823	-0.0251294	-0.0254634	-0.00310907	-0.00975239	-0.00414601	0.00549309	0.0118823	0.0107564	0.00554209	0.000189942	-0.00477731	-0.00584426	-0.000269399	0.0309349	0.0132513	0.00136419	0.00362705	0.00824184	0.0119969	0.0152946	0.014322	-0.00132077	-0.0194006	-0.0167616	-0.0146943	0.0345293	0.0244995	0.00653601	-0.00507555	0.0276344	0.0217176	0.0151781	0.00763123	-0.00204959	-0.0281848	-0.0218809	-0.0148776	-0.00883037	0.000853541	-0.0331704	-0.0216003
X3	-0.0349193	0.0373928	0.0591805	-0.0344748	-0.00211609	-0.00261682	-0.0422269	-0.0312067	-0.024267	-0.0252188	-0.0049179	-0.0139263	-0.00544008	0.00857564	0.017464	0.0158065	0.00875795	0.00181671	-0.00518764	-0.00711075	-0.000990586	0.0471643	0.0199266	0.00302177	0.00324362	0.0086846	0.0134657	0.0181894	0.0190181	-0.00419339	-0.0333045	-0.0266707	-0.0217159	0.0221045	0.0145783	0.00217903	-0.00773207	0.0458627	0.0363813	0.0255742	0.0132339	-0.00240994	-0.026163	-0.020849	-0.0149056	-0.00975664	-0.00153533	-0.0377663	-0.03079
X4	0.0366944	-0.0374063	-0.0344748	0.305236	-0.0188267	-0.0363113	0.0103025	-0.0156121	-0.0373324	-0.0426157	-0.0414754	-0.0218649	-0.0130277	-0.00023599	0.0107311	0.00739199	0.00382376	-0.00163432	-0.0153199	-0.0231347	-0.0330962	-0.0361423	-0.0392929	-0.031499	-0.023104	-0.0179441	-0.0136226	-0.00988963	-0.00191485	-0.0293957	0.021033	-0.00215371	-0.0125289	-0.0327053	-0.0294809	-0.0220252	-0.0218678	-0.0330061	-0.034491	-0.0364223	-0.0393221	-0.0403739	0.225497	0.16409	0.0956379	0.0311116	-0.0259286	-0.00607042	-0.0396279
X5	-0.0116175	-0.000333452	-0.00211609	-0.0188267	0.0429995	0.01711	-0.0297109	-0.0294556	0.00335667	0.00591155	0.00694362	0.00428249	0.000383213	-0.00453793	-0.00541624	-0.00174573	0.00138631	0.00347652	0.00681857	0.00785502	0.00607986	-0.00226163	0.00760166	0.00861761	0.00446675	0.00228179	0.000671914	-0.00044164	0.000539222	0.0117625	-0.0138025	-0.00620215	-0.0018109	-0.00437108	-0.00297889	-0.00224642	0.00152541	-0.000888978	0.000326907	0.00194526	0.00401163	0.00623414	-0.0127917	-0.00808804	-0.00258815	0.00245899	0.0310127	-0.0278276	0.0104868
X6	-0.0307135	0.000180522	-0.00261682	-0.0363113	0.01711	0.0355118	-0.0465279	-0.0382403	0.000765817	0.00244497	0.0210939	0.0151714	0.0106068	-0.00186982	-0.00683338	-0.00271267	0.002276	0.0058707	0.0109584	0.0123555	0.0104915	-0.000957941	0.0090087	0.0113181	0.00708135	0.00355395	0.000560602	-0.00211021	-0.000611672	0.0284409	-0.0284512	-0.00706061	0.00317725	-0.00457241	-0.00061513	0.00403964	0.0117383	-0.000899784	0.00249881	0.00650694	0.010966	0.0171193	-0.0241297	-0.0146737	-0.0037899	0.00704345	0.0256308	-0.0398234	0.0241445
X7	0.106793	-0.036828	-0.0422269	0.0103025	-0.0297109	-0.0465279	0.282198	0.211086	-0.0280228	-0.0331181	-0.0299089	-0.0385646	-0.039841	-0.0221824	-0.0187023	-0.0248544	-0.027938	-0.0267498	-0.0293847	-0.0305531	-0.0323609	-0.0408202	-0.0317392	-0.0272789	-0.0202483	-0.0182017	-0.016832	-0.0162736	-0.0242333	-0.0460806	0.126449	0.051456	0.0154401	8.02121e-05	-0.00274377	-0.00470127	-0.0114088	-0.0402365	-0.0382022	-0.0361199	-0.0339273	-0.031482	0.00188132	-0.00419799	-0.0115965	-0.0184641	-0.0372944	0.243871	-0.0160389
X8	0.0566212	-0.0281823	-0.0312067	-0.0156121	-0.0294556	-0.0382403	0.211086	0.211565	0.00888278	0.00638157	-0.021722	-0.0302523	-0.0308479	-0.0206135	-0.0202648	-0.0238307	-0.0255648	-0.0246858	-0.0249265	-0.0249165	-0.0249758	-0.0298002	-0.0258822	-0.0230305	-0.0180292	-0.0171826	-0.016892	-0.0171724	-0.0227906	-0.0372311	0.0786828	0.0311661	0.00772438	0.00905434	0.00653686	0.00575193	-0.000890983	-0.0263387	-0.0247457	-0.0231192	-0.021049	-0.0194313	-0.0163058	-0.0167139	-0.0176028	-0.0181956	-0.0337599	0.208008	-0.00771134
X9	-0.0404993	-0.0251294	-0.024267	-0.0373324	0.00335667	0.000765817	-0.0280228	0.00888278	0.152736	0.159625	0.0102022	0.0193694	0.00409963	-0.0181354	-0.0261117	-0.0206351	-0.0122474	-0.00575081	0.003143	0.00616234	0.00311043	-0.0177945	-0.00409777	0.00150385	-0.0049161	-0.0111954	-0.0167144	-0.0218508	-0.0239552	0.00249866	-0.0318332	-0.00483263	0.00758028	-0.00957125	-0.00332108	0.00951308	0.0153469	-0.00326546	0.00220922	0.00842822	0.0171158	0.0245031	-0.0290826	-0.0196679	-0.00914408	0.000225309	0.00155277	-0.0125569	0.0347298
X10	-0.0438735	-0.0254634	-0.0252188	-0.0426157	0.00591155	0.00244497	-0.0331181	0.00638157	0.159625	0.168605	0.0119949	0.0210249	0.00555678	-0.0188691	-0.0274324	-0.0213632	-0.0124476	-0.00552284	0.00393071	0.00711219	0.00379926	-0.0181879	-0.00386609	0.0020095	-0.00475681	-0.0114293	-0.0173091	-0.0227777	-0.024955	0.00387491	-0.035676	-0.00594352	0.00779993	-0.00987715	-0.00333781	0.00979164	0.0163777	-0.00296367	0.00292315	0.00969024	0.0191313	0.027152	-0.0329993	-0.0222548	-0.0102563	0.000472446	0.00355594	-0.0166504	0.037287
X11	-0.025902	-0.00310907	-0.0049179	-0.0414754	0.00694362	0.0210939	-0.0299089	-0.021722	0.0102022	0.0119949	0.0297336	0.014613	0.00728732	-0.00441093	-0.00891293	-0.00565581	-0.00135725	0.00214774	0.0073949	0.00923085	0.00889076	-0.00326747	0.00554523	0.00763504	0.00395469	0.000448705	-0.00249719	-0.00511202	-0.0037807	0.0167726	-0.021811	-0.00391516	0.00493095	-0.0046517	-0.00166914	0.00216829	0.00769191	-0.00125465	0.003815	0.00967548	0.0163296	0.0249319	-0.0257026	-0.0136651	-0.000181519	0.0131867	0.0129431	-0.0246817	0.0216504
X12	-0.0262668	-0.00975239	-0.0139263	-0.0218649	0.00428249	0.0151714	-0.0385646	-0.0302523	0.0193694	0.0210249	0.014613	0.0376087	0.0214915	0.00352579	-0.00679777	-0.00410727	0.0018786	0.00589338	0.0115585	0.0136925	0.0124986	-0.00806584	-0.000499896	0.00643177	0.00485318	0.00056493	-0.00349729	-0.00759189	-0.00452826	0.0177184	-0.0210958	0.00631253	0.0211299	-0.00996851	-0.00466193	0.0033466	0.0113881	-0.0088116	-0.00447096	0.000321077	0.00565347	0.012703	-0.0146326	-0.00919328	-0.00281919	0.0041662	0.00791884	-0.0337473	0.0252477
X13	-0.0231104	-0.00414601	-0.00544008	-0.0130277	0.000383213	0.0106068	-0.039841	-0.0308479	0.00409963	0.00555678	0.00728732	0.0214915	0.0254803	0.00878924	0.00119227	0.00310071	0.0063718	0.00809376	0.0110711	0.012295	0.012204	8.82632e-05	5.10633e-05	0.00513288	0.00552351	0.00306628	0.00066162	-0.00176114	0.00105091	0.0159471	-0.0217167	-0.000599363	0.00982256	-0.00634224	-0.00207668	0.00439102	0.0107349	-0.00357725	-0.00159983	0.000514869	0.00271961	0.00591528	-0.00954048	-0.0067479	-0.00339814	0.000477101	0.00374743	-0.034095	0.0160477
X14	-0.00900823	0.00549309	0.00857564	-0.00023599	-0.00453793	-0.00186982	-0.0221824	-0.0206135	-0.0181354	-0.0188691	-0.00441093	0.00352579	0.00878924	0.0163625	0.0129129	0.00958655	0.00756671	0.00609386	0.00512813	0.00510047	0.00619334	0.00922326	0.00334792	0.00375115	0.00523717	0.00609829	0.00698415	0.00802948	0.00938485	0.00145436	-0.0097989	-0.00360634	-0.000631483	0.000628934	0.000320491	-0.000319406	-0.000706276	0.00493689	0.00299249	0.000686675	-0.00214359	-0.00520266	-0.00130896	-0.00235935	-0.00345275	-0.00434046	-0.00356576	-0.0211051	-0.00155526
X15	-0.00371851	0.0118823	0.017464	0.0107311	-0.00541624	-0.00683338	-0.0187023	-0.0202648	-0.0261117	-0.0274324	-0.00891293	-0.00679777	0.00119227	0.0129129	0.0164514	0.0126674	0.00789799	0.00448168	0.00111442	0.000319983	0.00241543	0.0153513	0.00497956	0.00175623	0.00351172	0.00616892	0.00872709	0.011399	0.0122066	-0.00436975	-0.00725776	-0.00776411	-0.00800462	0.0047319	0.00215947	-0.00206546	-0.00570403	0.0112051	0.00725545	0.00272421	-0.0026305	-0.00896458	0.00676758	0.00329022	-0.000605517	-0.00454969	-0.00590552	-0.0197539	-0.0132013
X16	-0.00752709	0.0107564	0.0158065	0.00739199	-0.00174573	-0.00271267	-0.0248544	-0.0238307	-0.0206351	-0.0213632	-0.00565581	-0.00410727	0.00310071	0.00958655	0.0126674	0.0109041	0.00734088	0.00442056	0.00195879	0.00154343	0.00363543	0.014373	0.00494842	0.00216359	0.00332753	0.00529302	0.00718445	0.00918342	0.0104395	-0.000821527	-0.010787	-0.0084054	-0.00711765	0.00376185	0.00197398	-0.00104942	-0.00353994	0.0106354	0.00742325	0.00372199	-0.000680403	-0.00581105	0.00473539	0.00233704	-0.000301922	-0.002938	-0.00222324	-0.0245071	-0.0106803
X17	-0.00943234	0.00554209	0.00875795	0.00382376	0.00138631	0.002276	-0.027938	-0.0255648	-0.0122474	-0.0124476	-0.00135725	0.0018786	0.0063718	0.00756671	0.00789799	0.00734088	0.00611847	0.00479883	0.00389889	0.0038122	0.00474607	0.00856864	0.00379752	0.00304872	0.00335779	0.00400711	0.0046576	0.00537424	0.00667797	0.00378817	-0.0120383	-0.00594253	-0.00289133	0.000143196	6.2673e-05	-0.000360638	-0.00027472	0.00597052	0.00444169	0.00266509	0.000494602	-0.00188162	0.00272113	0.00159369	0.000409735	-0.000699649	0.00157471	-0.0264952	-0.00313829
X18	-0.0073377	0.000189942	0.00181671	-0.00163432	0.00347652	0.0058707	-0.0267498	-0.0246858	-0.00575081	-0.00552284	0.00214774	0.00589338	0.00809376	0.00609386	0.00448168	0.00442056	0.00479883	0.00508918	0.00568562	0.00587769	0.0056142	0.00276983	0.00292285	0.00415087	0.00371458	0.00321335	0.00284408	0.00256969	0.00351677	0.00688791	-0.009847	-0.00239784	0.00095182	-0.00334653	-0.00200923	-0.000266042	0.00198066	0.00112798	0.0011516	0.00116716	0.00108309	0.00123373	-0.000902353	-0.000461962	0.000113131	0.000716288	0.00427392	-0.0250275	0.00458802
X19	-0.0121632	-0.00477731	-0.00518764	-0.0153199	0.00681857	0.0109584	-0.0293847	-0.0249265	0.003143	0.00393071	0.0073949	0.0115585	0.0110711	0.00512813	0.00111442	0.00195879	0.00389889	0.00568562	0.00916663	0.0106882	0.0102232	-0.00175828	0.00354774	0.00740182	0.00568526	0.00352203	0.00181501	0.000419369	0.00150766	0.011444	-0.0127049	-0.000646537	0.00476987	-0.00643731	-0.00349259	0.000800673	0.00537882	-0.00350262	-0.00165743	0.000446167	0.00280397	0.00594315	-0.0105768	-0.00688507	-0.00263865	0.0015692	0.00820967	-0.025944	0.0138051
X20	-0.0149751	-0.00584426	-0.00711075	-0.0231347	0.00785502	0.0123555	-0.0305531	-0.0249165	0.00616234	0.00711219	0.00923085	0.0136925	0.012295	0.00510047	0.000319983	0.00154343	0.0038122	0.00587769	0.0106882	0.0131185	0.0133538	-0.00214448	0.00420706	0.0091167	0.00694992	0.00414483	0.00196945	0.000246726	0.00154139	0.0128736	-0.0143061	-0.000375093	0.00601174	-0.00694369	-0.00355873	0.00152786	0.00661266	-0.00476635	-0.0023518	0.000379722	0.00346256	0.00752846	-0.0162973	-0.0109757	-0.00488895	0.00115003	0.00927277	-0.0263706	0.0161553
X21	-0.0186624	-0.000269399	-0.000990586	-0.0330962	0.00607986	0.0104915	-0.0323609	-0.0249758	0.00311043	0.00379926	0.00889076	0.0124986	0.012204	0.00619334	0.00241543	0.00363543	0.00474607	0.0056142	0.0102232	0.0133538	0.0165745	0.00521254	0.00561117	0.0096177	0.00807284	0.00561678	0.00384626	0.00268514	0.00463128	0.0116042	-0.016928	-0.00263093	0.00422858	-0.00276492	-0.00052765	0.00298979	0.00611784	-0.000201216	0.00127811	0.0028611	0.00458658	0.00705004	-0.0240417	-0.0171385	-0.00926261	-0.00140598	0.00727596	-0.0278596	0.0106821
X22	-0.0334606	0.0309349	0.0471643	-0.0361423	-0.00226163	-0.000957941	-0.0408202	-0.0298002	-0.0177945	-0.0181879	-0.00326747	-0.00806584	8.82632e-05	0.00922326	0.0153513	0.014373	0.00856864	0.00276983	-0.00175828	-0.00214448	0.00521254	0.0422629	0.0151716	0.00363723	0.00480217	0.00841778	0.0117604	0.0153639	0.0172808	-0.000880529	-0.0312829	-0.0220297	-0.0162405	0.0183346	0.0127461	0.00389744	-0.0039533	0.0365679	0.0291527	0.0205859	0.0107465	-0.0015435	-0.0279032	-0.0222513	-0.0158644	-0.00990585	-0.00143376	-0.0364637	-0.0238202
X23	-0.0212115	0.0132513	0.0199266	-0.0392929	0.00760166	0.0090087	-0.0317392	-0.0258822	-0.00409777	-0.00386609	0.00554523	-0.000499896	5.10633e-05	0.00334792	0.00497956	0.00494842	0.00379752	0.00292285	0.00354774	0.00420706	0.00561117	0.0151716	0.0174749	0.0111975	0.00672656	0.0075251	0.00854918	0.00973256	0.00782338	0.00627987	-0.0202904	-0.0115572	-0.0069413	0.00600966	0.00429118	0.000461812	-0.00033432	0.0157705	0.013635	0.0114358	0.00911632	0.00582759	-0.0282263	-0.0200134	-0.0108899	-0.00286549	0.00929134	-0.0273588	2.24383e-05
X24	-0.0157731	0.00136419	0.00302177	-0.031499	0.00861761	0.0113181	-0.0272789	-0.0230305	0.00150385	0.0020095	0.00763504	0.00643177	0.00513288	0.00375115	0.00175623	0.00216359	0.00304872	0.00415087	0.00740182	0.0091167	0.0096177	0.00363723	0.0111975	0.0115134	0.00733192	0.00602844	0.0053656	0.00511656	0.00409151	0.00981229	-0.0148632	-0.00457149	0.000262951	-0.001806	-0.00062987	0.000471552	0.00320287	0.00278603	0.00342519	0.00429962	0.00542557	0.00669225	-0.0224564	-0.015478	-0.00766362	-0.000554452	0.0103239	-0.0234211	0.0103193
X25	-0.00796957	0.00362705	0.00324362	-0.023104	0.00446675	0.00708135	-0.0202483	-0.0180292	-0.0049161	-0.00475681	0.00395469	0.00485318	0.00552351	0.00523717	0.00351172	0.00332753	0.00335779	0.00371458	0.00568526	0.00694992	0.00807284	0.00480217	0.00672656	0.00733192	0.00590904	0.0051704	0.00478973	0.00471324	0.00464905	0.00688101	-0.00844255	-0.00206209	0.000802459	0.000229757	0.000677511	0.000857606	0.00217043	0.00209667	0.00219373	0.00235535	0.0025239	0.00282687	-0.0170315	-0.0123514	-0.00707133	-0.00210092	0.00572609	-0.0179567	0.0056536
X26	-0.0053333	0.00824184	0.0086846	-0.0179441	0.00228179	0.00355395	-0.0182017	-0.0171826	-0.0111954	-0.0114293	0.000448705	0.00056493	0.00306628	0.00609829	0.00616892	0.00529302	0.00400711	0.00321335	0.00352203	0.00414483	0.00561678	0.00841778	0.0075251	0.00602844	0.0051704	0.00562973	0.00624906	0.00703584	0.00657634	0.00359387	-0.00687188	-0.00364955	-0.00218659	0.00330699	0.00237347	0.00028691	-0.0002721	0.00571106	0.00448222	0.00315006	0.00159517	-0.000262756	-0.0135572	-0.0102986	-0.00664934	-0.00337418	0.00313608	-0.0167663	-0.000646525
X27	-0.00370979	0.0119969	0.0134657	-0.0136226	0.000671914	0.000560602	-0.016832	-0.016892	-0.0167144	-0.0173091	-0.00249719	-0.00349729	0.00066162	0.00698415	0.00872709	0.00718445	0.0046576	0.00284408	0.00181501	0.00196945	0.00384626	0.0117604	0.00854918	0.0053656	0.00478973	0.00624906	0.00778248	0.00943493	0.00859447	0.000702853	-0.00604816	-0.00543497	-0.00515456	0.00575484	0.00364281	-0.000362443	-0.00254068	0.00891059	0.00652522	0.00389468	0.000854587	-0.00287799	-0.0106348	-0.00853186	-0.00621696	-0.00437107	0.0011501	-0.0160984	-0.00604035
X28	-0.00323055	0.0152946	0.0181894	-0.00988963	-0.00044164	-0.00211021	-0.0162736	-0.0171724	-0.0218508	-0.0227777	-0.00511202	-0.00759189	-0.00176114	0.00802948	0.011399	0.00918342	0.00537424	0.00256969	0.000419369	0.000246726	0.00268514	0.0153639	0.00973256	0.00511656	0.00471324	0.00703584	0.00943493	0.0120061	0.0109676	-0.00200006	-0.00609398	-0.00763748	-0.00835469	0.00784544	0.0046579	-0.00105247	-0.00476821	0.0121409	0.00864689	0.00476879	0.000309572	-0.00521144	-0.00816565	-0.00704808	-0.00586597	-0.00524934	-0.000384045	-0.0160885	-0.0110497
X29	-0.0129738	0.014322	0.0190181	-0.00191485	0.000539222	-0.000611672	-0.0242333	-0.0227906	-0.0239552	-0.024955	-0.0037807	-0.00452826	0.00105091	0.00938485	0.0122066	0.0104395	0.00667797	0.00351677	0.00150766	0.00154139	0.00463128	0.0172808	0.00782338	0.00409151	0.00464905	0.00657634	0.00859447	0.0109676	0.012772	-0.000226212	-0.013846	-0.0106041	-0.0083987	0.00639553	0.00382008	-0.000663329	-0.00394289	0.0128002	0.00936704	0.00544693	0.00080326	-0.00456032	-0.00205587	-0.00254553	-0.00299891	-0.00345358	0.000333432	-0.0235193	-0.011468
X30	-0.0284885	-0.00132077	-0.00419339	-0.0293957	0.0117625	0.0284409	-0.0460806	-0.0372311	0.00249866	0.00387491	0.0167726	0.0177184	0.0159471	0.00145436	-0.00436975	-0.000821527	0.00378817	0.00688791	0.011444	0.0128736	0.0116042	-0.000880529	0.00627987	0.00981229	0.00688101	0.00359387	0.000702853	-0.00200006	-0.000226212	0.0257579	-0.0267667	-0.00501939	0.00553554	-0.00527464	-0.000956454	0.00470585	0.0122875	-0.00228158	0.000781679	0.00429632	0.00814106	0.0135547	-0.0198683	-0.0124667	-0.00390197	0.00479056	0.0189892	-0.0396335	0.0223311
X31	0.135981	-0.0194006	-0.0333045	0.021033	-0.0138025	-0.0284512	0.126449	0.0786828	-0.0318332	-0.035676	-0.021811	-0.0210958	-0.0217167	-0.0097989	-0.00725776	-0.010787	-0.0120383	-0.009847	-0.0127049	-0.0143061	-0.016928	-0.0312829	-0.0202904	-0.0148632	-0.00844255	-0.00687188	-0.00604816	-0.00609398	-0.013846	-0.0267667	0.11824	0.0523588	0.0167154	-0.0061181	-0.00772099	-0.00962164	-0.012956	-0.032456	-0.030702	-0.0287728	-0.0268523	-0.0244267	0.0120531	0.00532371	-0.0026781	-0.01073	-0.0205967	0.102059	-0.012813
X32	0.058966	-0.0167616	-0.0266707	-0.00215371	-0.00620215	-0.00706061	0.051456	0.0311661	-0.00483263	-0.00594352	-0.00391516	0.00631253	-0.000599363	-0.00360634	-0.00776411	-0.0084054	-0.00594253	-0.00239784	-0.000646537	-0.000375093	-0.00263093	-0.0220297	-0.0115572	-0.00457149	-0.00206209	-0.00364955	-0.00543497	-0.00763748	-0.0106041	-0.00501939	0.0523588	0.0315769	0.0194544	-0.00856189	-0.00643261	-0.00276986	-0.000207045	-0.0229969	-0.0195453	-0.0157221	-0.0115495	-0.00617105	-0.00283016	-0.00310581	-0.00354025	-0.0037883	-0.00732654	0.0417309	0.00853123
X33	0.0157798	-0.0146943	-0.0217159	-0.0125289	-0.0018109	0.00317725	0.0154401	0.00772438	0.00758028	0.00779993	0.00493095	0.0211299	0.00982256	-0.000631483	-0.00800462	-0.00711765	-0.00289133	0.00095182	0.00476987	0.00601174	0.00422858	-0.0162405	-0.0069413	0.000262951	0.000802459	-0.00218659	-0.00515456	-0.00835469	-0.0083987	0.00553554	0.0167154	0.0194544	0.0206112	-0.00926211	-0.00547016	0.000579423	0.00589655	-0.0170984	-0.0130403	-0.00856099	-0.00361607	0.00283737	-0.00926779	-0.00665354	-0.00365607	-0.000228145	-0.000597917	0.0120805	0.0173053
X34	-0.00782322	0.0345293	0.0221045	-0.0327053	-0.00437108	-0.00457241	8.02121e-05	0.00905434	-0.00957125	-0.00987715	-0.0046517	-0.00996851	-0.00634224	0.000628934	0.0047319	0.00376185	0.000143196	-0.00334653	-0.00643731	-0.00694369	-0.00276492	0.0183346	0.00600966	-0.001806	0.000229757	0.00330699	0.00575484	0.00784544	0.00639553	-0.00527464	-0.0061181	-0.00856189	-0.00926211	0.0259425	0.018744	0.00648819	-0.00247705	0.0166191	0.0127622	0.00846465	0.00358998	-0.00292896	-0.02539	-0.0201669	-0.0143991	-0.00930735	-0.00389324	0.00343884	-0.0147408
X35	-0.0101386	0.0244995	0.0145783	-0.0294809	-0.00297889	-0.00061513	-0.00274377	0.00653686	-0.00332108	-0.00333781	-0.00166914	-0.00466193	-0.00207668	0.000320491	0.00215947	0.00197398	6.2673e-05	-0.00200923	-0.00349259	-0.00355873	-0.00052765	0.0127461	0.00429118	-0.00062987	0.000677511	0.00237347	0.00364281	0.0046579	0.00382008	-0.000956454	-0.00772099	-0.00643261	-0.00547016	0.018744	0.0141421	0.00626514	0.000611359	0.0113137	0.00900286	0.00641644	0.00348183	-0.000472961	-0.0226919	-0.0176919	-0.0121167	-0.00699861	-0.00165029	0.00112676	-0.00726859
X36	-0.0138887	0.00653601	0.00217903	-0.0220252	-0.00224642	0.00403964	-0.00470127	0.00575193	0.00951308	0.00979164	0.00216829	0.0033466	0.00439102	-0.000319406	-0.00206546	-0.00104942	-0.000360638	-0.000266042	0.000800673	0.00152786	0.00298979	0.00389744	0.000461812	0.000471552	0.000857606	0.00028691	-0.000362443	-0.00105247	-0.000663329	0.00470585	-0.00962164	-0.00276986	0.000579423	0.00648819	0.00626514	0.00614316	0.00557202	0.00278805	0.00287452	0.00288103	0.00289021	0.00285765	-0.0169489	-0.0129013	-0.00829275	-0.00370263	0.000236893	-5.5091e-05	0.00405671
X37	-0.0175438	-0.00507555	-0.00773207	-0.0218678	0.00152541	0.0117383	-0.0114088	-0.000890983	0.0153469	0.0163777	0.00769191	0.0113881	0.0107349	-0.000706276	-0.00570403	-0.00353994	-0.00027472	0.00198066	0.00537882	0.00661266	0.00611784	-0.0039533	-0.00033432	0.00320287	0.00217043	-0.0002721	-0.00254068	-0.00476821	-0.00394289	0.0122875	-0.012956	-0.000207045	0.00589655	-0.00247705	0.000611359	0.00557202	0.00996527	-0.00438537	-0.00203479	0.000567003	0.00352885	0.00731586	-0.0160466	-0.0112582	-0.00575382	-0.000100304	0.00554841	-0.00578458	0.0155898
X38	-0.0348261	0.0276344	0.0458627	-0.0330061	-0.000888978	-0.000899784	-0.0402365	-0.0263387	-0.00326546	-0.00296367	-0.00125465	-0.0088116	-0.00357725	0.00493689	0.0112051	0.0106354	0.00597052	0.00112798	-0.00350262	-0.00476635	-0.000201216	0.0365679	0.0157705	0.00278603	0.00209667	0.00571106	0.00891059	0.0121409	0.0128002	-0.00228158	-0.032456	-0.0229969	-0.0170984	0.0166191	0.0113137	0.00278805	-0.00438537	0.0376185	0.0306401	0.0226925	0.0138009	0.00212336	-0.0247496	-0.0189881	-0.0125436	-0.00687598	-0.000374969	-0.0344638	-0.0204988
X39	-0.0334555	0.0217176	0.0363813	-0.034491	0.000326907	0.00249881	-0.0382022	-0.0247457	0.00220922	0.00292315	0.003815	-0.00447096	-0.00159983	0.00299249	0.00725545	0.00742325	0.00444169	0.0011516	-0.00165743	-0.0023518	0.00127811	0.0291527	0.013635	0.00342519	0.00219373	0.00448222	0.00652522	0.00864689	0.00936704	0.000781679	-0.030702	-0.0195453	-0.0130403	0.0127622	0.00900286	0.00287452	-0.00203479	0.0306401	0.0258203	0.0203413	0.0142586	0.00616355	-0.0250503	-0.0182243	-0.0105864	-0.00362594	0.00164425	-0.0323482	-0.0127215
X40	-0.0318427	0.0151781	0.0255742	-0.0364223	0.00194526	0.00650694	-0.0361199	-0.0231192	0.00842822	0.00969024	0.00967548	0.000321077	0.000514869	0.000686675	0.00272421	0.00372199	0.00266509	0.00116716	0.000446167	0.000379722	0.0028611	0.0205859	0.0114358	0.00429962	0.00235535	0.00315006	0.00389468	0.00476879	0.00544693	0.00429632	-0.0287728	-0.0157221	-0.00856099	0.00846465	0.00641644	0.00288103	0.000567003	0.0226925	0.0203413	0.0177073	0.0148797	0.0108905	-0.0255238	-0.0173972	-0.00831234	0.000168053	0.00416849	-0.0301034	-0.00374003
X41	-0.0303252	0.00763123	0.0132339	-0.0393221	0.00401163	0.010966	-0.0339273	-0.021049	0.0171158	0.0191313	0.0163296	0.00565347	0.00271961	-0.00214359	-0.0026305	-0.000680403	0.000494602	0.00108309	0.00280397	0.00346256	0.00458658	0.0107465	0.00911632	0.00542557	0.0025239	0.00159517	0.000854587	0.000309572	0.00080326	0.00814106	-0.0268523	-0.0115495	-0.00361607	0.00358998	0.00348183	0.00289021	0.00352885	0.0138009	0.0142586	0.0148797	0.0158178	0.016484	-0.026607	-0.0168304	-0.00592162	0.00441012	0.00713105	-0.0275574	0.00672463
X42	-0.0285003	-0.00204959	-0.00240994	-0.0403739	0.00623414	0.0171193	-0.031482	-0.0194313	0.0245031	0.027152	0.0249319	0.012703	0.00591528	-0.00520266	-0.00896458	-0.00581105	-0.00188162	0.00123373	0.00594315	0.00752846	0.00705004	-0.0015435	0.00582759	0.00669225	0.00282687	-0.000262756	-0.00287799	-0.00521144	-0.00456032	0.0135547	-0.0244267	-0.00617105	0.00283737	-0.00292896	-0.000472961	0.00285765	0.00731586	0.00212336	0.00616355	0.0108905	0.016484	0.023163	-0.0259619	-0.0146606	-0.00203624	0.010205	0.0108822	-0.0249167	0.0195526
X43	0.0235375	-0.0281848	-0.026163	0.225497	-0.0127917	-0.0241297	0.00188132	-0.0163058	-0.0290826	-0.0329993	-0.0257026	-0.0146326	-0.00954048	-0.00130896	0.00676758	0.00473539	0.00272113	-0.000902353	-0.0105768	-0.0162973	-0.0240417	-0.0279032	-0.0282263	-0.0224564	-0.0170315	-0.0135572	-0.0106348	-0.00816565	-0.00205587	-0.0198683	0.0120531	-0.00283016	-0.00926779	-0.02539	-0.0226919	-0.0169489	-0.0160466	-0.0247496	-0.0250503	-0.0255238	-0.026607	-0.0259619	0.16833	0.123708	0.0739168	0.0270182	-0.0172348	-0.00930418	-0.0273209
X44	0.0137562	-0.0218809	-0.020849	0.16409	-0.00808804	-0.0146737	-0.00419799	-0.0167139	-0.0196679	-0.0222548	-0.0136651	-0.00919328	-0.0067479	-0.00235935	0.00329022	0.00233704	0.00159369	-0.000461962	-0.00688507	-0.0109757	-0.0171385	-0.0222513	-0.0200134	-0.015478	-0.0123514	-0.0102986	-0.00853186	-0.00704808	-0.00254553	-0.0124667	0.00532371	-0.00310581	-0.00665354	-0.0201669	-0.0176919	-0.0129013	-0.0112582	-0.0189881	-0.0182243	-0.0173972	-0.0168304	-0.0146606	0.123708	0.0921431	0.056885	0.0236729	-0.0104947	-0.0116891	-0.0167984
X45	0.00218938	-0.0148776	-0.0149056	0.0956379	-0.00258815	-0.0037899	-0.0115965	-0.0176028	-0.00914408	-0.0102563	-0.000181519	-0.00281919	-0.00339814	-0.00345275	-0.000605517	-0.000301922	0.000409735	0.000113131	-0.00263865	-0.00488895	-0.00926261	-0.0158644	-0.0108899	-0.00766362	-0.00707133	-0.00664934	-0.00621696	-0.00586597	-0.00299891	-0.00390197	-0.0026781	-0.00354025	-0.00365607	-0.0143991	-0.0121167	-0.00829275	-0.00575382	-0.0125436	-0.0105864	-0.00831234	-0.00592162	-0.00203624	0.0739168	0.056885	0.0378276	0.0199085	-0.00271005	-0.0149084	-0.00487728
X46	-0.00982049	-0.00883037	-0.00975664	0.0311116	0.00245899	0.00704345	-0.0184641	-0.0181956	0.000225309	0.000472446	0.0131867	0.0041662	0.000477101	-0.00434046	-0.00454969	-0.002938	-0.000699649	0.000716288	0.0015692	0.00115003	-0.00140598	-0.00990585	-0.00286549	-0.000554452	-0.00210092	-0.00337418	-0.00437107	-0.00524934	-0.00345358	0.00479056	-0.01073	-0.0037883	-0.000228145	-0.00930735	-0.00699861	-0.00370263	-0.000100304	-0.00687598	-0.00362594	0.000168053	0.00441012	0.010205	0.0270182	0.0236729	0.0199085	0.0165763	0.00470038	-0.0177943	0.0068112
X47	-0.0201903	0.000853541	-0.00153533	-0.0259286	0.0310127	0.0256308	-0.0372944	-0.0337599	0.00155277	0.00355594	0.0129431	0.00791884	0.00374743	-0.00356576	-0.00590552	-0.00222324	0.00157471	0.00427392	0.00820967	0.00927277	0.00727596	-0.00143376	0.00929134	0.0103239	0.00572609	0.00313608	0.0011501	-0.000384045	0.000333432	0.0189892	-0.0205967	-0.00732654	-0.000597917	-0.00389324	-0.00165029	0.000236893	0.00554841	-0.000374969	0.00164425	0.00416849	0.00713105	0.0108822	-0.0172348	-0.0104947	-0.00271005	0.00470038	0.0291795	-0.0331634	0.0161028
X48	0.0823785	-0.0331704	-0.0377663	-0.00607042	-0.0278276	-0.0398234	0.243871	0.208008	-0.0125569	-0.0166504	-0.0246817	-0.0337473	-0.034095	-0.0211051	-0.0197539	-0.0245071	-0.0264952	-0.0250275	-0.025944	-0.0263706	-0.0278596	-0.0364637	-0.0273588	-0.0234211	-0.0179567	-0.0167663	-0.0160984	-0.0160885	-0.0235193	-0.0396335	0.102059	0.0417309	0.0120805	0.00343884	0.00112676	-5.5091e-05	-0.00578458	-0.0344638	-0.0323482	-0.0301034	-0.0275574	-0.0249167	-0.00930418	-0.0116891	-0.0149084	-0.0177943	-0.0331634	0.228154	-0.00973077
Y1	-0.0199464	-0.0216003	-0.03079	-0.0396279	0.0104868	0.0241445	-0.0160389	-0.00771134	0.0347298	0.037287	0.0216504	0.0252477	0.0160477	-0.00155526	-0.0132013	-0.0106803	-0.00313829	0.00458802	0.0138051	0.0161553	0.0106821	-0.0238202	2.24383e-05	0.0103193	0.0056536	-0.000646525	-0.00604035	-0.0110497	-0.011468	0.0223311	-0.012813	0.00853123	0.0173053	-0.0147408	-0.00726859	0.00405671	0.0155898	-0.0204988	-0.0127215	-0.00374003	0.00672463	0.0195526	-0.0273209	-0.0167984	-0.00487728	0.0068112	0.0161028	-0.00973077	0.0473499
Y2	-0.0134406	-0.0297071	0.00150134	-0.021225	-0.00388483	-0.00149154	0.00524333	0.00696932	0.00590676	0.00547602	0.00216016	0.0065492	0.00943892	0.00734927	0.0038261	0.00410322	0.00351636	0.00345705	0.0074175	0.0111618	0.0174477	0.0117745	-0.000210902	0.005948	0.00569041	0.00274464	0.00108559	0.000806904	0.00484313	0.00228394	-0.00540042	0.00130738	0.00456088	-0.018565	-0.0126012	-0.000113102	0.00446277	0.00167238	0.00177275	0.00131449	0.000657733	0.000614732	-0.0175066	-0.0142126	-0.0103217	-0.00554616	-0.00445759	0.00562005	0.00175874
Y3	0.00956739	-0.000736248	0.00968932	0.0315576	-0.00993597	-0.0130542	0.00877853	0.00600891	-0.0172652	-0.0211236	-0.0118472	-0.0037295	0.000225605	0.00477799	0.008085	0.00706684	0.00416708	0.00094072	-0.00319599	-0.00416809	-0.000466233	0.00980251	-0.0127999	-0.0104302	-0.00489004	-0.00354321	-0.00239405	-0.00111897	0.00395411	-0.00867673	0.00962264	0.00226608	-0.000991945	-9.4723e-05	-0.000645631	0.000562612	-0.00365338	0.00754803	0.00411212	-0.000561283	-0.00646297	-0.0127292	0.0216701	0.0130905	0.00384104	-0.00408284	-0.0132396	0.00450201	-0.019668
Y4	0.0384307	0.00915069	0.00587739	0.090015	-0.0153928	-0.0234839	0.0268813	0.0124034	-0.0298371	-0.0325712	-0.0241882	-0.0208875	-0.0127192	-0.000561891	0.0074038	0.00472587	6.11578e-05	-0.00469661	-0.0145191	-0.0192076	-0.0207454	-0.000395805	-0.0122996	-0.0179433	-0.0110143	-0.00544965	-0.00144699	0.00148812	0.00171316	-0.020718	0.0285009	0.00331353	-0.00899065	0.0060367	0.00129505	-0.00577684	-0.0134549	0.000409661	-0.00405612	-0.00922276	-0.0154569	-0.0225287	0.064248	0.0442627	0.0218825	0.000607693	-0.0186201	0.0174782	-0.032311
Y5	-0.010729	0.0146048	0.0218739	0.0116275	-0.0169816	-0.00695356	-0.0103483	-0.00805156	-0.0158384	-0.0178489	-0.00476727	-0.0120004	-0.0070917	0.00510253	0.0104429	0.0079339	0.00307055	-0.000826521	-0.00487632	-0.00591182	-0.00282781	0.0175376	0.00653101	0.000253805	0.000401425	0.00352859	0.00674529	0.0102972	0.0104588	-0.0073098	-0.00976503	-0.0113013	-0.0121458	0.00897285	0.00509346	-0.000731657	-0.00666365	0.0160965	0.0120681	0.0074758	0.0021907	-0.00419338	0.00832838	0.00568378	0.00265539	-0.000604751	-0.0110122	-0.0101942	-0.01703
Y6	-0.00922985	0.00814106	0.0172271	0.0325078	-0.00770716	-0.0109935	-0.0116128	-0.00908319	-0.0226478	-0.0249869	-0.00847796	-0.0126512	-0.00401078	0.0075118	0.0124519	0.0103535	0.00505858	0.000459836	-0.00321242	-0.00344937	0.00152434	0.0174591	-0.000374415	-0.00268923	0.000272382	0.00262792	0.00513977	0.00837087	0.0125413	-0.00875674	-0.00872877	-0.011263	-0.012425	0.00415903	0.00163142	-0.000978385	-0.0066462	0.0115737	0.00767597	0.00292132	-0.00284677	-0.0090124	0.0225076	0.0149188	0.00662821	-0.000781537	-0.00944392	-0.011654	-0.0208166
Y7	-0.0100334	-0.0253331	-0.0306151	-0.0196199	0.00340399	0.00597735	0.0666805	0.0531507	0.0219803	0.0241513	0.00947016	0.0102874	0.00168759	-0.00863267	-0.0151567	-0.014562	-0.00990831	-0.00489785	0.000620157	0.00178579	-0.00291583	-0.0265073	-0.0081637	-0.000983717	-0.00308751	-0.00677472	-0.0100854	-0.0134646	-0.0143024	0.00492126	0.00366839	0.00879012	0.0134759	-0.0101165	-0.00540956	0.00178306	0.00927208	-0.0227163	-0.0166182	-0.00959767	-0.00145486	0.00832308	-0.0139746	-0.00885392	-0.00315242	0.00273036	0.00428051	0.0604982	0.0266284
Y8	-0.0115224	-0.00753899	-0.00716206	-0.0248836	0.00336328	0.00486532	0.01581	0.0218654	0.0121949	0.0150853	0.00700932	0.00494407	0.00115594	-0.00304379	-0.00647532	-0.00577529	-0.00374714	-0.0018668	0.00113368	0.00208094	0.000939945	-0.00634217	0.000893131	0.00220391	0.000189982	-0.00136777	-0.00272519	-0.00400516	-0.00460435	0.00314474	-0.00539146	1.17988e-05	0.00362424	-0.0020246	-0.000643795	0.00084648	0.00442999	-0.00410885	-0.00200992	0.000582485	0.00378717	0.00722364	-0.0178663	-0.0121399	-0.00577666	0.000342613	0.00411602	0.0191771	0.0104597
Y9	-0.0145503	-0.00139049	0.000485662	-0.00341592	0.0051319	0.00249571	-0.0146416	-0.00774256	0.014212	0.0160877	0.0030192	0.00370348	0.000822313	-0.000761752	-0.00141437	-0.00056099	6.38801e-05	0.000282464	0.00144797	0.00198197	0.00179362	0.000697969	0.00203907	0.00202116	0.000706679	9.09343e-05	-0.000334422	-0.0006212	7.81866e-05	0.00177928	-0.0132738	-0.00606616	-0.00141773	-0.00149257	-0.000989642	-0.00053677	0.000705108	0.00218854	0.00254062	0.00307154	0.00392046	0.004492	-0.00192624	-0.000708712	0.000668594	0.00193811	0.00406778	-0.0106886	0.00245007
Y10	-0.00749381	0.00688959	0.010411	0.00288211	0.00176804	-0.000734132	-0.0057785	-0.00527112	-0.0106202	-0.0117746	-0.00155171	-0.00613792	-0.00451409	0.000818328	0.00426935	0.0033152	0.00152597	-0.000137456	-0.00137944	-0.00173371	-0.000731841	0.00746482	0.00502474	0.00183113	0.000947884	0.00218338	0.00352842	0.00502132	0.00507696	-0.00236228	-0.0067386	-0.00713794	-0.00689018	0.00369881	0.00181681	-0.00160426	-0.00363378	0.00737979	0.00548629	0.00350135	0.00135155	-0.00157947	0.00256953	0.00199414	0.00129336	0.000267965	0.00104975	-0.00556255	-0.0077928
Y11	-0.0124156	0.00590898	0.0128313	0.0201446	-0.00259805	-0.00227045	-0.0121625	-0.0104612	-0.0149807	-0.0168845	-0.00485403	-0.00577878	-0.0029864	0.00415651	0.00749283	0.00643406	0.0036245	0.000722964	-0.00148466	-0.00167009	0.000676915	0.0116537	0.00169921	-0.000619652	0.000406095	0.00192344	0.00345099	0.00522552	0.00769213	-0.00247354	-0.0105118	-0.0090937	-0.00783571	0.0025118	0.0011344	-0.000408937	-0.00343229	0.00885576	0.00612044	0.0028333	-0.00115255	-0.0052536	0.0145126	0.00965557	0.00438272	-0.000334725	-0.00240265	-0.0119842	-0.0125075
Y12	-0.0145647	-0.00402165	0.00131388	0.0177767	-0.000964116	-0.000315053	-0.01985	-0.0146053	0.00635406	0.00621318	0.000766865	0.00751478	0.00517485	0.0024571	0.00190186	0.00248671	0.00250713	0.00178813	0.00185171	0.00233304	0.00343484	0.00337128	-0.00371162	-0.00212246	-0.000472468	-0.00105456	-0.00163859	-0.00210689	0.00146778	0.00109757	-0.012789	-0.00392291	0.00130293	-0.00440771	-0.00292824	0.00043315	0.000944965	0.00171387	0.00167959	0.00136067	0.000837652	0.000721981	0.0130988	0.00948592	0.00564815	0.00267349	-0.0018052	-0.0184323	-0.00182887
Y13	-0.0169666	-0.00439065	-0.00087275	0.029579	-0.00514801	-0.00341164	-0.0207476	-0.0125583	0.0058377	0.00664857	-0.00516929	0.00613715	0.0125386	0.0067038	0.00582384	0.00653297	0.00605463	0.00452188	0.00362856	0.00359435	0.00418962	0.00312998	-0.00945667	-0.00622203	-0.00220929	-0.00233819	-0.00289544	-0.00374834	4.11609e-05	0.00189435	-0.015634	-0.00488119	0.000599219	-0.00412263	-0.00202314	0.0024959	0.00362211	0.000397342	-0.00020882	-0.00123363	-0.00261305	-0.00385613	0.0208559	0.014039	0.00663711	0.000274832	-0.00639913	-0.0186709	-0.00175894
Y14	0.00187922	-0.00307494	-0.00539329	0.0108823	0.00617543	0.0052167	-0.0119207	-0.0105572	0.00952031	0.0103134	0.00312419	0.00243587	0.00217676	-0.00660785	-0.00580433	-0.0028478	-0.000686755	0.000320815	0.000569244	0.000247658	-0.00109398	-0.00497192	-0.00259548	-0.00165542	-0.00218065	-0.00296949	-0.00388122	-0.00501486	-0.00480601	0.00467671	-0.0011259	0.000726577	0.00112644	-0.00331013	-0.00185765	0.000454213	0.00233806	-0.00300994	-0.00175534	-0.000343976	0.00127728	0.00330536	0.00884176	0.00743644	0.00592079	0.00451775	0.00536101	-0.0113794	0.00322339
Y15	-0.00382103	-0.0105992	-0.0169352	-0.00199681	0.0116556	0.0154663	-0.019306	-0.0139067	0.0225426	0.0243945	0.011407	0.0150606	0.0103126	-0.00898124	-0.0149423	-0.00907807	-0.00249498	0.00119657	0.00458917	0.00522616	0.00249121	-0.0136693	-0.00417524	0.0005119	-0.00129798	-0.00454764	-0.00780909	-0.0113483	-0.010693	0.0145298	-0.00450344	0.00529582	0.00967762	-0.00843175	-0.00395734	0.0029258	0.00940485	-0.0107106	-0.00649771	-0.00175858	0.00365	0.0105467	8.67327e-05	0.00206586	0.00445283	0.00720675	0.0126224	-0.0158578	0.0169928
Y16	-0.00136073	-0.0200793	-0.03007	-0.00347699	0.0125845	0.0201487	-0.0166007	-0.0127103	0.0315343	0.0335806	0.0155789	0.0241078	0.0145278	-0.00774262	-0.0193643	-0.0142382	-0.00429633	0.00219484	0.00747195	0.00812083	0.00262629	-0.025291	-0.00663923	0.00179875	-0.000910526	-0.00591974	-0.0108398	-0.0161409	-0.0161424	0.0192024	-0.0012431	0.0119569	0.017714	-0.0148673	-0.00790142	0.00269276	0.0130822	-0.0203964	-0.0136333	-0.00594561	0.00289637	0.0140035	-0.000295799	0.0025436	0.00588469	0.00969033	0.0152623	-0.0130985	0.0296862
Y17	0.013957	-0.027187	-0.0394045	-0.011821	0.011507	0.0202258	-0.000169717	-0.00256839	0.0343862	0.0365734	0.0163621	0.023927	0.0125962	-0.0077343	-0.0201614	-0.0170379	-0.00660954	0.00216972	0.00847056	0.0087364	0.000874017	-0.0342657	-0.0074438	0.00308872	-0.000258215	-0.0060411	-0.011544	-0.0173624	-0.0195002	0.0186621	0.0123626	0.0203163	0.0221981	-0.0187291	-0.0108229	0.00105666	0.0132109	-0.0278125	-0.0195438	-0.0100291	0.000999785	0.0145115	-0.00664943	-0.00188109	0.00352777	0.00899373	0.0150406	0.000822901	0.039851
Y18	0.0251197	-0.0284961	-0.0418216	-0.0187726	0.00922042	0.0177755	0.0129168	0.00650022	0.0292097	0.0311772	0.015628	0.0199454	0.00927732	-0.00685957	-0.0179008	-0.0161818	-0.00730829	0.00185616	0.00860802	0.0089651	0.000731514	-0.0364816	-0.00720184	0.00386039	0.000747964	-0.00491407	-0.0101517	-0.0155584	-0.0187152	0.0157651	0.0224893	0.0243635	0.0224762	-0.0187808	-0.0113398	-0.000255755	0.011401	-0.0305036	-0.0219715	-0.0121021	-0.000682192	0.0132592	-0.0121625	-0.0060852	0.000727253	0.00733204	0.0128112	0.0120831	0.0427299
Y19	0.00725803	-0.0190531	-0.0322779	-0.0357331	0.00825947	0.0156905	0.00380911	0.00413727	0.0228251	0.0243156	0.014574	0.0175013	0.00991003	-0.00242636	-0.0116925	-0.00982566	-0.00410995	0.00227572	0.0108891	0.0139073	0.0102414	-0.0245392	-0.00174726	0.00846214	0.00538687	0.000108932	-0.00436794	-0.00847031	-0.00993513	0.0144345	0.00902869	0.0157538	0.016981	-0.0120432	-0.00642091	0.00212205	0.010718	-0.0236787	-0.0167144	-0.00869243	0.000571598	0.0120561	-0.0255907	-0.0168508	-0.00699296	0.00263804	0.0111688	0.00613795	0.0359723
Y20	0.00215117	-0.00951363	-0.0215236	-0.0388308	0.00567066	0.0104069	0.00311849	0.004529	0.0146937	0.015559	0.0104936	0.0126463	0.00763181	-0.000394311	-0.0071039	-0.00572412	-0.0023654	0.00143851	0.00874223	0.0123665	0.0122614	-0.0138994	0.000679628	0.00829259	0.00612518	0.00221299	-0.000958618	-0.00366873	-0.00450403	0.0100733	0.0051491	0.0105016	0.0118907	-0.0052277	-0.00194784	0.00314488	0.00800099	-0.0161086	-0.0113197	-0.00585456	0.000430077	0.00833372	-0.0286174	-0.0201083	-0.0105117	-0.00109459	0.00732047	0.00541234	0.0235664
Y21	0.000859829	0.00533295	-0.00234771	-0.0369279	-1.90809e-07	0.00182695	0.00365191	0.00512268	0.000539154	0.000444324	0.00340383	0.00291775	0.00250949	0.00184716	-0.000185984	5.75297e-05	-0.000240168	-7.3358e-05	0.00322901	0.00601119	0.00988326	0.00269703	0.00307835	0.00515562	0.00507229	0.00391479	0.00313963	0.0027566	0.00239778	0.00236378	0.00331678	0.00372468	0.00344964	0.0051276	0.00452849	0.00372774	0.00271134	-0.00229681	-0.00137851	-0.000409263	0.000660846	0.00213429	-0.028285	-0.0213168	-0.0134726	-0.0057962	0.000493583	0.00464272	0.00409448
Y22	0.00338146	0.0181223	0.0172797	-0.0194064	-0.00409963	-0.00498966	0.005498	0.00536803	-0.0121567	-0.0128265	-0.00507961	-0.00990072	-0.00612436	0.00201321	0.00499173	0.00361523	0.000431002	-0.00214443	-0.00491877	-0.00547629	-0.00251475	0.0144994	0.00542964	-0.000402872	0.000906271	0.00334903	0.00548859	0.0075304	0.00587851	-0.0054614	0.00311357	-0.00347577	-0.00676928	0.0135166	0.00914927	0.00204286	-0.00385719	0.01222	0.00894715	0.00525024	0.00105249	-0.00431711	-0.0158675	-0.0130778	-0.0100373	-0.00741218	-0.00396071	0.00520249	-0.0125355
Y23	0.0230941	-0.00511748	-0.0177499	-0.000937587	-0.00214109	-0.000603285	0.0196212	0.0135603	-0.000831498	-0.00104837	-0.00108186	0.00383836	0.00309698	0.000128795	-0.00378975	-0.00389172	-0.00240233	-0.000585123	0.00129114	0.00215174	0.00195395	-0.0116713	-0.0084844	-0.00241683	0.000198114	-0.00130979	-0.00274482	-0.00412573	-0.00428339	0.000859165	0.0209942	0.0139309	0.00921029	-0.00174883	-0.000593847	0.00147265	0.0026786	-0.0149192	-0.0124217	-0.00969748	-0.00674783	-0.00269667	-0.00201271	-0.00224355	-0.00242442	-0.0021495	-0.00202728	0.0168187	0.00782787
Y24	0.0254635	0.00816808	-0.0019904	-0.00189851	-0.00646043	-0.00613018	0.0204693	0.0143465	-0.0108274	-0.0114638	-0.00595465	-0.00348863	-0.000830913	0.000870343	0.000399677	-0.000449414	-0.00141532	-0.00200843	-0.00367155	-0.0041932	-0.00302338	1.19568e-05	-0.00662655	-0.00643681	-0.00164074	-0.000743094	-0.000441903	-0.000462525	-0.000693887	-0.00460467	0.0217455	0.00996838	0.00334935	0.0073922	0.00525997	0.00197589	-0.00124881	-0.00348644	-0.00396702	-0.00463635	-0.00562376	-0.00654523	-0.00339904	-0.00425574	-0.00517493	-0.00567386	-0.00678538	0.0168323	-0.00560177
Y25	0.0228027	0.0259215	0.0256046	0.00872891	-0.00873623	-0.0148593	0.0139095	0.00696597	-0.0251863	-0.0266955	-0.0154251	-0.0208289	-0.0133294	0.000927195	0.00883162	0.00624948	0.000936754	-0.00373064	-0.0115141	-0.0147628	-0.0137244	0.0155658	0.00568796	-0.00606104	-0.00370028	0.00208522	0.00659004	0.0101059	0.00622203	-0.0147723	0.0159012	-0.00313543	-0.0123902	0.0179851	0.0106932	-0.00155747	-0.0109964	0.0171777	0.0111609	0.00445753	-0.00319946	-0.0130448	0.00453748	0.00094861	-0.00329882	-0.00816278	-0.0104063	0.00952077	-0.0277112
Y26	0.0198645	0.0277747	0.0298229	0.0109971	-0.00743111	-0.0160864	0.0111723	0.00411018	-0.0271905	-0.0288654	-0.0165526	-0.0251335	-0.0169504	0.00104947	0.010852	0.00778441	0.00151403	-0.00385117	-0.0122633	-0.0156844	-0.0145531	0.01802	0.00920005	-0.00399619	-0.00324168	0.00323584	0.00867459	0.0132443	0.008226	-0.0167431	0.0127103	-0.00700204	-0.0165435	0.0187879	0.010704	-0.00294619	-0.0133191	0.0204726	0.0136054	0.00602113	-0.00253087	-0.0137052	0.00650259	0.00264795	-0.00199572	-0.00766909	-0.00964585	0.00690643	-0.0309663
Y27	0.015801	0.0259321	0.0293764	0.00935579	-0.00482992	-0.0151803	0.00850417	0.00203593	-0.0250687	-0.0267277	-0.0154422	-0.0262584	-0.0182994	0.0009314	0.0111449	0.00802084	0.00162535	-0.00361756	-0.0113026	-0.0142642	-0.0128265	0.0182908	0.0107717	-0.00160435	-0.0021499	0.00394964	0.00945525	0.0144314	0.00912345	-0.016516	0.00935175	-0.00903603	-0.0181088	0.0173699	0.00955978	-0.00358035	-0.0136672	0.0204943	0.0138017	0.00644805	-0.00174823	-0.0126135	0.00554765	0.00238069	-0.00153011	-0.0067159	-0.00749795	0.00488186	-0.029649
Y28	0.00773866	0.0201894	0.0250445	0.0053252	-0.000312837	-0.0114291	0.00236185	-0.00185016	-0.0177096	-0.019024	-0.0117641	-0.0232128	-0.016626	0.00057753	0.00952746	0.00703994	0.00154967	-0.00275167	-0.00840845	-0.0103883	-0.00869821	0.0165238	0.0109283	0.00121692	-0.000555092	0.00411398	0.00874854	0.0133542	0.00892822	-0.0133576	0.00321665	-0.0102847	-0.0171864	0.0132515	0.00697149	-0.00347796	-0.0117467	0.0180505	0.0124923	0.00640732	-0.000269032	-0.00926923	0.00289984	0.00109377	-0.00123353	-0.00485302	-0.00335123	0.000208238	-0.0234802
Y29	-0.0170874	-7.7736e-05	0.00298053	0.00504338	0.00765756	0.00571146	-0.0199985	-0.0157694	0.00157613	0.00163359	0.00474311	0.0029947	0.00119321	-0.000737984	-0.000779255	0.000837997	0.00137414	0.00114969	0.00198767	0.00263539	0.0037556	0.0038293	0.00117209	0.00163815	0.000889413	3.20645e-05	-0.000489538	-0.000511548	0.0029301	0.00411206	-0.0142859	-0.00655234	-0.00228804	-0.00197396	-0.00126509	0.00011927	0.000633222	0.00305471	0.00324272	0.00335115	0.00340192	0.00386446	0.00455616	0.00407958	0.00377977	0.0039533	0.00654266	-0.0186395	0.000576903
Y30	-0.0122865	0.0030526	0.0100165	0.0318074	-0.00616274	-0.00720679	-0.0155652	-0.0131594	-0.012446	-0.0141516	-0.00596803	-0.00316034	0.00174857	0.00613168	0.00898989	0.00806176	0.0049101	0.00171615	-0.000577394	-0.000528864	0.00294769	0.0117113	-0.00355881	-0.0036495	-0.000513998	0.000590549	0.00169845	0.00321629	0.00802873	-0.00428535	-0.0110183	-0.00771377	-0.00583626	0.000314866	-0.00032144	7.47611e-05	-0.00299011	0.00684026	0.00444607	0.00134136	-0.00257657	-0.00641158	0.0226096	0.0153164	0.00739509	0.000558409	-0.00734653	-0.0160894	-0.0132841
Y31	-0.0190726	-0.0185358	-0.0279659	-0.0307111	0.0128249	0.024796	-0.0350888	-0.0244612	0.0335592	0.0371627	0.0216119	0.027434	0.0182677	-0.000632078	-0.0110783	-0.00826454	-0.000829878	0.00631889	0.0145551	0.0163804	0.0107178	-0.0216664	0.000654357	0.0101952	0.00583542	4.04385e-05	-0.00501195	-0.00983982	-0.00986326	0.0236572	-0.0197007	0.005222	0.0161945	-0.0151026	-0.00779763	0.00269317	0.0146559	-0.0182681	-0.0108804	-0.00229006	0.00770119	0.019897	-0.0203217	-0.0113256	-0.00113355	0.00878756	0.0177477	-0.0270686	0.0428705
Y32	-0.00441793	-0.0121642	-0.0168653	-0.00584877	0.00971147	0.0111289	-0.0149247	-0.0149394	0.0163502	0.0185366	0.010815	0.0176446	0.00854318	-0.0018774	-0.0068767	-0.00516061	-0.000992703	0.00266368	0.00644936	0.00721982	0.00375341	-0.0141719	-0.00174609	0.00340589	0.00170616	-0.00116544	-0.00384137	-0.00660154	-0.00585281	0.0108901	-0.0063768	0.00384778	0.0104387	-0.0104005	-0.00638946	-0.000887202	0.00590976	-0.0117005	-0.00752741	-0.00269339	0.00287306	0.00969442	-0.00277282	-0.000119066	0.00293341	0.00615925	0.00991851	-0.0142791	0.0186296
Y33	-0.00329812	-0.00716617	-0.00639249	0.00755663	0.00494362	0.00316838	-0.01091	-0.0103727	0.00866487	0.00956134	0.00436717	0.010444	0.00332081	-0.00127382	-0.00288217	-0.00192216	-0.000247988	0.000930184	0.00214038	0.00246642	0.00121091	-0.00543016	-0.00257622	-0.000331902	-0.000284507	-0.00148976	-0.00269734	-0.00395585	-0.00216636	0.00322055	-0.00382374	0.000780403	0.00502656	-0.00647042	-0.00451051	-0.00148102	0.00128503	-0.00419044	-0.00255225	-0.000731166	0.00133426	0.00395832	0.00638957	0.00546219	0.00452665	0.00405273	0.00361225	-0.0112659	0.00468271
Y34	-0.0129396	-0.0180116	-0.00577263	-0.0256749	0.000387298	0.00428047	0.000585447	0.00547285	0.0137504	0.0155215	0.00792038	0.00986179	0.00806301	0.00245879	-0.00246277	-0.00131935	0.000408527	0.00197282	0.00627014	0.00885249	0.0106517	0.000148924	-0.000253656	0.00450054	0.00319067	0.000366465	-0.00176429	-0.00320341	-0.00100882	0.00550949	-0.00750538	0.00139103	0.00613179	-0.0112442	-0.00683722	0.00133542	0.00608407	-0.00271133	-0.000665214	0.00148678	0.00402248	0.0072184	-0.0191181	-0.0135297	-0.00727728	-0.000815571	0.00118996	0.00308121	0.00957306
Y35	-0.0115211	-0.0111108	-0.00805351	-0.0253579	0.00197722	0.00532592	0.00626009	0.013065	0.0160012	0.0187993	0.00882478	0.00842249	0.00447552	-0.00135226	-0.00584453	-0.00471116	-0.00230763	-0.000210589	0.00348638	0.00499227	0.00431607	-0.00557183	-5.9636e-05	0.00269961	0.000926008	-0.00127853	-0.00318213	-0.0048507	-0.00431018	0.0047205	-0.00662588	0.000990656	0.00542815	-0.00569238	-0.0029416	0.00143863	0.00563301	-0.00423316	-0.00170415	0.00125811	0.00485135	0.00889511	-0.0181495	-0.0121331	-0.00548996	0.00099758	0.0031548	0.0097523	0.011522
Y36	-0.0146924	0.00452999	0.00357729	-0.0149053	0.00815574	0.010616	-0.0203405	-0.0182018	-0.0103355	-0.00857033	0.00754646	0.00613894	0.00489025	0.00248182	0.00113145	0.00185171	0.00258225	0.00288869	0.0041656	0.0046261	0.0044558	0.00310586	0.00602875	0.00540254	0.00390446	0.00343395	0.00308527	0.00279856	0.00352449	0.00857338	-0.0147483	-0.00579205	-0.000199849	0.000214414	0.000408473	-0.000932482	0.0017282	0.00226319	0.00279108	0.0036134	0.00452217	0.00573633	-0.00953888	-0.00576404	-0.00148544	0.00268805	0.00958598	-0.0175397	0.00410717
Y37	-0.0139862	0.00125874	0.00607077	0.0120791	0.000429799	-0.00049559	-0.013512	-0.00910047	-0.000725102	-0.000908704	-0.000926742	-0.000349681	0.000103292	0.0019959	0.00313666	0.00326366	0.00212668	0.000622733	-3.60899e-07	0.000228385	0.00163453	0.00633514	0.00020752	-0.000441281	0.000169781	0.000533986	0.000972833	0.00160574	0.00389317	-0.000412101	-0.0122173	-0.00745313	-0.00416543	-0.000174827	-0.000341117	-0.000247434	-0.00111837	0.00490821	0.00383084	0.0025068	0.000935915	-0.000703117	0.00896153	0.00637781	0.00361047	0.00128819	-0.000155451	-0.0116538	-0.005714
Y38	0.00645245	0.003755	0.00616976	0.00910319	-0.00752113	-0.00892911	0.00933111	0.00604063	-0.00740652	-0.00948432	-0.00670921	-0.0010195	0.000880359	0.00152692	0.00412673	0.00354002	0.00170116	-7.2068e-05	-0.00231925	-0.00275129	-0.000586137	0.00612753	-0.00602969	-0.00623728	-0.00268992	-0.00171519	-0.00109983	-0.00065414	0.0016367	-0.00589848	0.00622943	0.00203327	0.000613309	0.00332118	0.00218832	0.00124842	-0.00172164	0.00403166	0.00229653	-5.0578e-05	-0.00313545	-0.00654934	0.00571418	0.00253289	-0.000896921	-0.00379366	-0.00912638	0.00579626	-0.0114053
Y39	0.00564613	0.00678328	0.0054242	0.0039701	-0.00484956	-0.0063816	0.00668228	0.00364518	-0.00728687	-0.0082312	-0.00484961	-0.002342	-0.000450937	0.000273787	0.00331501	0.00265282	0.00102099	-0.000303028	-0.00209103	-0.00264428	-0.00171936	0.00410147	-0.00210687	-0.00376525	-0.00164522	-0.0005061	0.000262539	0.000763904	0.00140357	-0.00485648	0.0042385	0.00044171	-0.000884394	0.00490125	0.0031483	0.000347945	-0.00216597	0.00319537	0.00187971	0.000318188	-0.00167935	-0.00422907	0.00258777	0.00102888	-0.000740437	-0.00250992	-0.00589367	0.00409931	-0.00863042
Y40	0.00400409	0.0097226	0.00717469	-0.00101066	-0.00115565	-0.00405625	0.000369917	-0.000919592	-0.007767	-0.00778793	-0.00320554	-0.00482085	-0.00265216	-0.000392973	0.00344562	0.00263067	0.000943231	-0.000281334	-0.00186763	-0.00256017	-0.00228385	0.00431746	0.00210076	-0.000966899	-0.000429282	0.000966457	0.00210144	0.00299446	0.00220302	-0.00423046	0.00134876	-0.00228643	-0.00376411	0.00615673	0.00371149	-0.000884393	-0.00336014	0.00479985	0.00336143	0.00194321	0.000382686	-0.00219277	-0.00043707	-0.000436049	-0.000606045	-0.00132547	-0.0023749	-0.000622979	-0.00760833
Y41	-0.00172185	0.00708375	0.00631498	-0.0023101	0.000860776	-0.00404619	-0.00214211	0.000226157	0.00504523	0.00568796	-0.00284699	-0.0058923	-0.00471803	-0.0018812	0.00170924	0.000991784	-0.000272528	-0.00118162	-0.00207663	-0.00254487	-0.002551	0.00347466	0.00345431	0.000393657	-0.000491021	0.000564806	0.00159308	0.00256132	0.00110763	-0.00492231	-0.0029288	-0.00475416	-0.00551887	0.00500743	0.00288926	-0.000940859	-0.00317633	0.00564023	0.00429283	0.00307165	0.00204238	-0.000372044	-0.00157995	-0.00100654	-0.000586776	-0.000988801	-0.00107839	-0.00148285	-0.00538365
Y42	-0.00980334	0.00789495	0.0126812	0.00905411	-0.000327254	-0.0012029	-0.00838452	-0.00769899	-0.0152343	-0.0169228	-0.00198327	-0.00657531	-0.00452879	0.00210848	0.00588626	0.00479443	0.00239038	4.65e-05	-0.00174225	-0.00206478	-0.000333076	0.00999681	0.00427099	0.000915886	0.000796686	0.00230733	0.00387326	0.00562396	0.00672691	-0.00258414	-0.00853316	-0.00848477	-0.00786438	0.00402163	0.00200459	-0.00131449	-0.0040584	0.00873383	0.00643827	0.00386601	0.000871975	-0.00259049	0.00709142	0.00505334	0.00279949	0.000586209	-0.000336916	-0.00826661	-0.0106966
Y43	0.0259636	0.0171605	0.0157071	0.0279134	-0.00827928	-0.0148823	0.0125965	0.00544948	-0.0267792	-0.028994	-0.0140942	-0.017039	-0.0115355	-0.000257732	0.00691789	0.00467743	0.000737453	-0.00291128	-0.00953618	-0.0123876	-0.012111	0.00815903	0.00120448	-0.00712448	-0.00456522	2.53982e-05	0.00349846	0.00603153	0.00366443	-0.0141943	0.0184856	0.000272744	-0.00892452	0.0112593	0.00572911	-0.00354645	-0.0108074	0.00915902	0.00473497	-0.000133034	-0.0057699	-0.012861	0.0214867	0.0142946	0.00592043	-0.00267983	-0.010424	0.00878834	-0.0245083
Y44	0.0196684	0.0188169	0.0189244	0.0034533	-0.00397036	-0.0121426	0.00899923	0.00419871	-0.0192514	-0.0208227	-0.0110084	-0.0180385	-0.0130144	-0.000741069	0.00669444	0.00446086	0.000459756	-0.00271793	-0.00782444	-0.00991285	-0.00921943	0.0109759	0.00700283	-0.0020536	-0.00193525	0.00221405	0.00569419	0.00855092	0.00430767	-0.012807	0.0131918	-0.00239657	-0.0106963	0.0126991	0.00691554	-0.00300793	-0.0101741	0.012774	0.00831104	0.00354209	-0.00171946	-0.00898978	0.00335819	0.00161391	-0.000789101	-0.00430469	-0.0064321	0.00714274	-0.0206011
Y45	0.0107141	0.0184466	0.0203968	-0.00920399	0.00036956	-0.00910922	0.00278245	0.00052833	-0.0112906	-0.0123817	-0.00928591	-0.0177749	-0.0132675	-0.000662669	0.00664156	0.00462996	0.000638038	-0.00222287	-0.00595929	-0.00733334	-0.00623951	0.012995	0.0103522	0.00162602	0.000105661	0.00363552	0.00692539	0.00999375	0.00533468	-0.0108007	0.00583101	-0.00569774	-0.0121829	0.0124674	0.00700253	-0.00237936	-0.00908214	0.0149595	0.0105121	0.00579761	0.000755592	-0.0065516	-0.0066505	-0.00549718	-0.00462184	-0.00529373	-0.00245874	0.00250647	-0.0169871
Y46	0.00189887	0.013838	0.0179535	-0.00214899	0.00162934	-0.00718067	-0.000406408	-0.00147786	-0.00922752	-0.0104103	-0.00850153	-0.0150081	-0.0112434	0.000344417	0.0064867	0.00483587	0.00113576	-0.00166609	-0.00454704	-0.00534874	-0.00379902	0.0126807	0.00833391	0.00165752	0.000463608	0.00320663	0.00594411	0.00878387	0.00612934	-0.00882155	-0.000189976	-0.0075065	-0.0115717	0.00921213	0.00497541	-0.00199983	-0.00762731	0.0132762	0.00928265	0.00494705	0.000238985	-0.0062442	-0.00194356	-0.0021673	-0.00264861	-0.00418937	-0.00114795	-0.000231062	-0.0150577
Y47	-0.0108507	0.0123402	0.020484	0.0286208	-0.0126216	-0.00784276	-0.0120142	-0.0101892	-0.0225963	-0.0254575	-0.00782837	-0.0157952	-0.00776669	0.00626303	0.0121083	0.00939516	0.00390417	-0.000554501	-0.00475863	-0.0056034	-0.00174429	0.0180246	0.00462711	-0.000255139	0.000700998	0.00372484	0.00703263	0.0110542	0.0126693	-0.0079231	-0.0105924	-0.0135822	-0.0152142	0.00689497	0.00337762	-0.00145501	-0.00750629	0.0140381	0.00974871	0.00472057	-0.00127029	-0.00790065	0.0203	0.0139197	0.00684635	8.63402e-05	-0.00815928	-0.0113999	-0.0202424
Y48	-0.0139643	-0.0159139	-0.0182107	-0.0242352	0.00333713	0.00619507	0.0364308	0.0376672	0.0190927	0.0217542	0.00888713	0.00811943	0.00204378	-0.00569646	-0.0109179	-0.0101129	-0.00666574	-0.00321381	0.00122711	0.00236272	-0.000487479	-0.0157893	-0.00313298	0.00101005	-0.00123089	-0.00393721	-0.00634232	-0.00872721	-0.00935284	0.00478559	-0.00403189	0.00308155	0.00803118	-0.00551828	-0.00243229	0.00199312	0.00760587	-0.0125746	-0.0084854	-0.00368623	0.00199727	0.00859783	-0.0172754	-0.0114152	-0.00488589	0.00159565	0.00454019	0.0378808	0.0192238
ln(cs)	-0.00210773	0.000667569	0.00144241	-0.00583413	-5.2142e-05	0.000354612	-0.00227401	-0.00171128	0.000641411	0.000774639	0.00252381	0.000491232	0.000186874	0.00020888	5.02573e-05	6.6277e-05	4.17361e-05	8.29228e-05	0.000324358	0.00047119	0.000696766	0.00100919	0.00113894	0.000691457	0.000406645	0.000348922	0.000297865	0.000249531	0.000245119	0.000151243	-0.00166506	-0.000665592	-0.000141729	0.000244962	0.000166759	2.12296e-05	-6.082e-05	0.00138147	0.00153863	0.00172654	0.00195689	0.00222497	-0.00384301	-0.00240863	-0.000833252	0.000681888	3.06878e-05	-0.00194048	0.000653469
[truncated: 48 more columns]
